# Supplementary material for: Internal electric fields in methanol [MeOH]2–6 clusters
Source: Royal Society of Chemistry journal article supplement (doi:10.1039/c9cp04571f), 2020-01-01
Supplement: c9cp04571f1.pdf [file c9cp04571f1.pdf]

Electronic supplementary information

Internal electric fields in methanol [MeOH]<sub>2-6</sub> clusters

Manjusha Boda and G. Naresh Patwari\*

Department of Chemistry, Indian Institute of Technology Bombay, Powai, Mumbai 400076 INDIA

E-mail: naresh@chem.iitb.ac.in

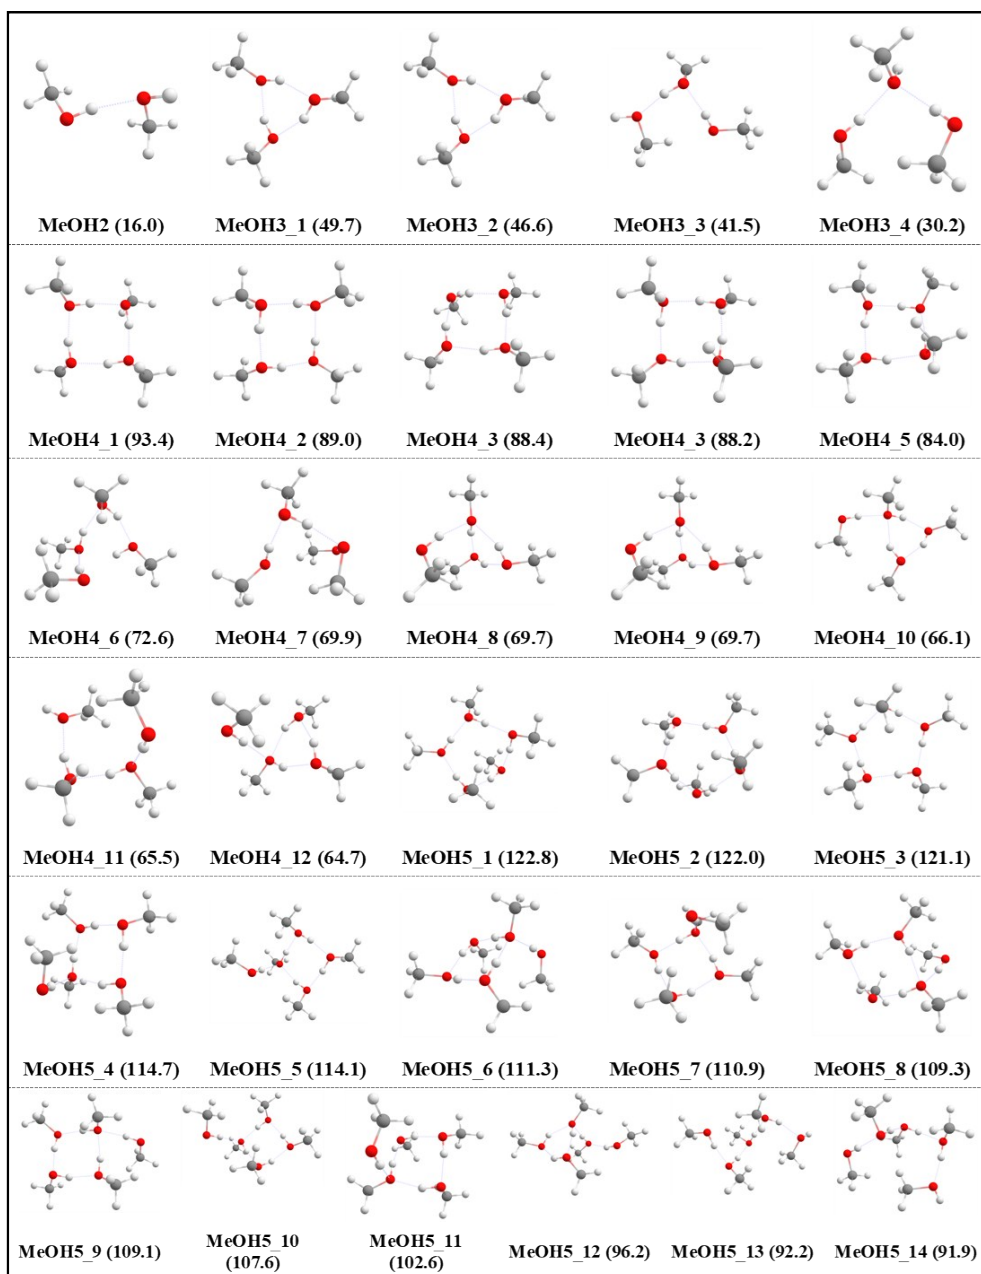

**Fig. S1.** Structures of [MeOH]<sub>n</sub> [*n*=2-5] clusters calculated at MP2/aug-cc-pVDZ level. The ZPE and BSSE corrected stabilization energies (kJ mol<sup>-1</sup>) are shown in parenthesis.

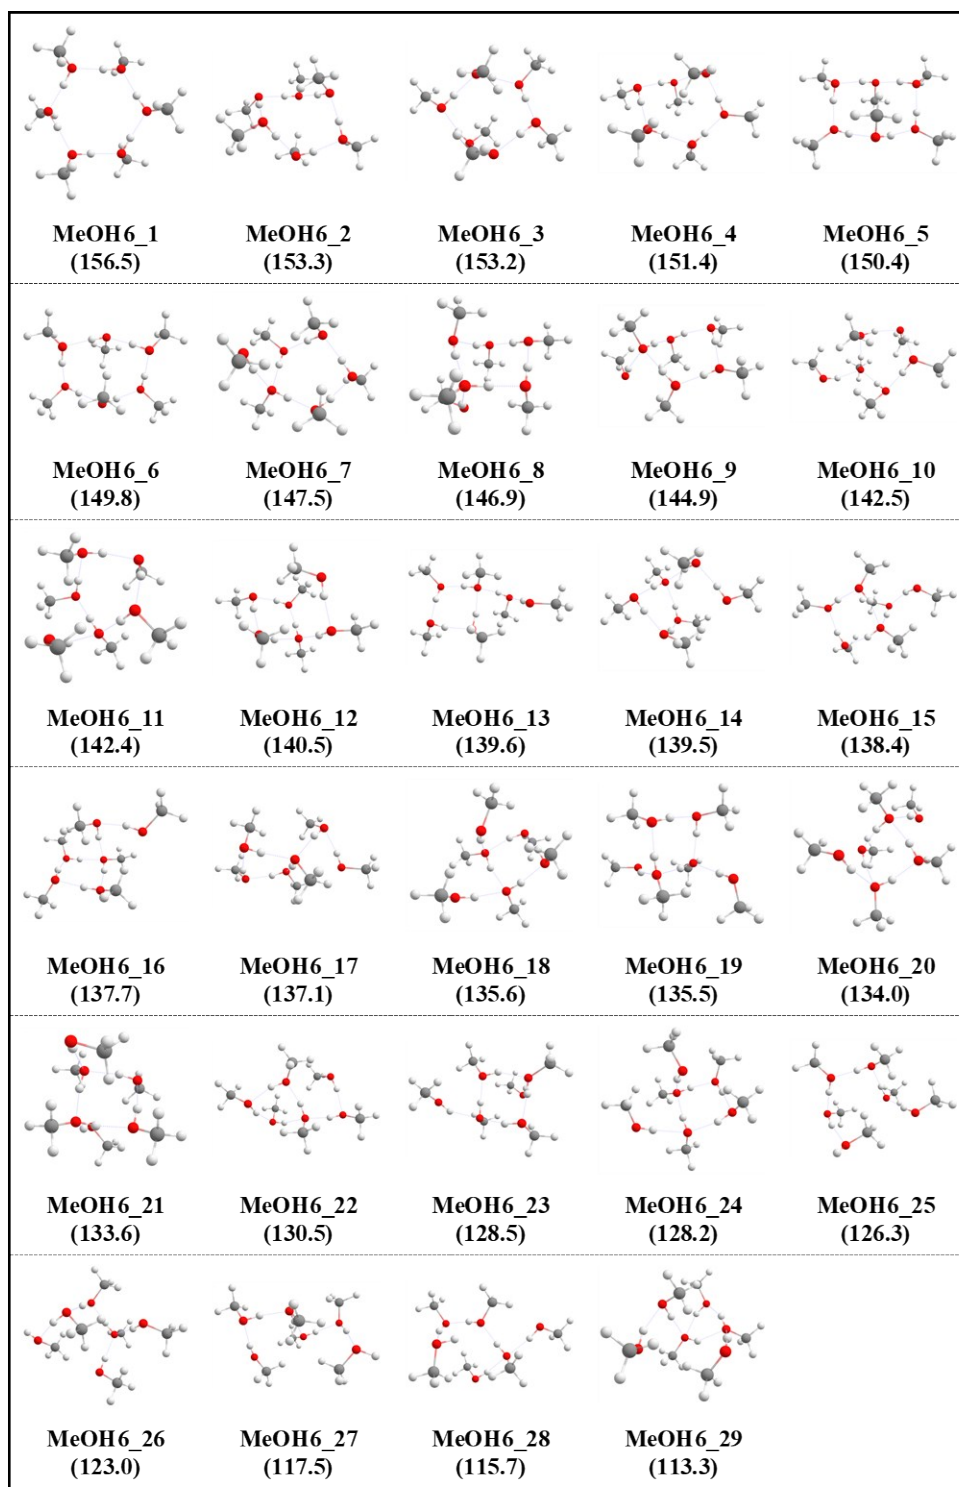

**Fig. S2.** Structures of  $[\text{MeOH}]_6$  cluster calculated at MP2/aug-cc-pVDZ level. The ZPE and BSSE corrected stabilization energies ( $\text{kJ mol}^{-1}$ ) are shown in parenthesis.

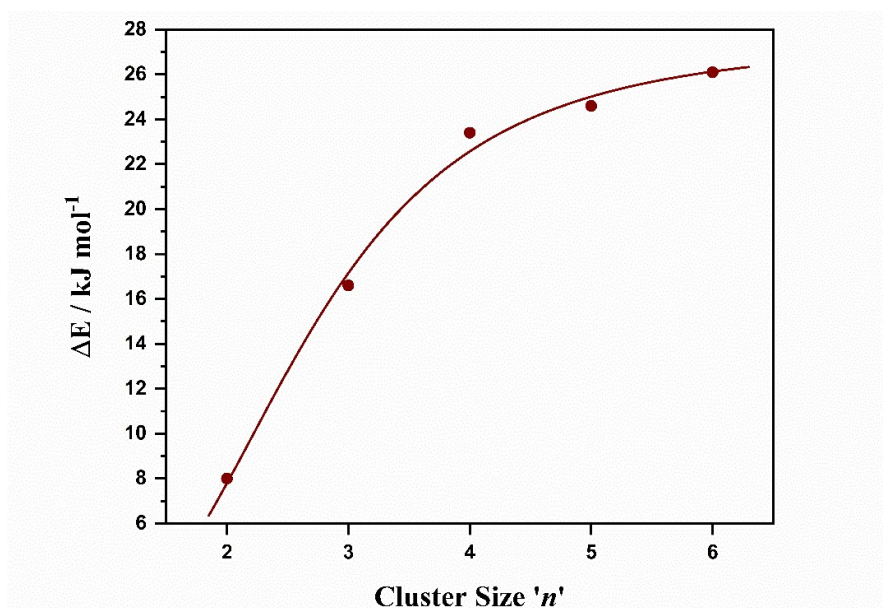

**Fig. S3.** Plot of stabilization energy per each methanol molecule for the most stable structure for a given cluster size. The solid line is a non-linear least square fit to the data points using a Hill equation [ $\Delta E = \Delta E_{max} \cdot [n^l / (n^l + k^l)]$ ]. Where  $\Delta E$  is the stabilization energy;  $\Delta E_{max}$  is the maximum stabilization energy;  $n$  is the cluster size;  $l$  is Hill-coefficient. The  $R^2$  value is 0.989 with  $\Delta E_{max}$  value of 27.5 kJ mol<sup>-1</sup>.

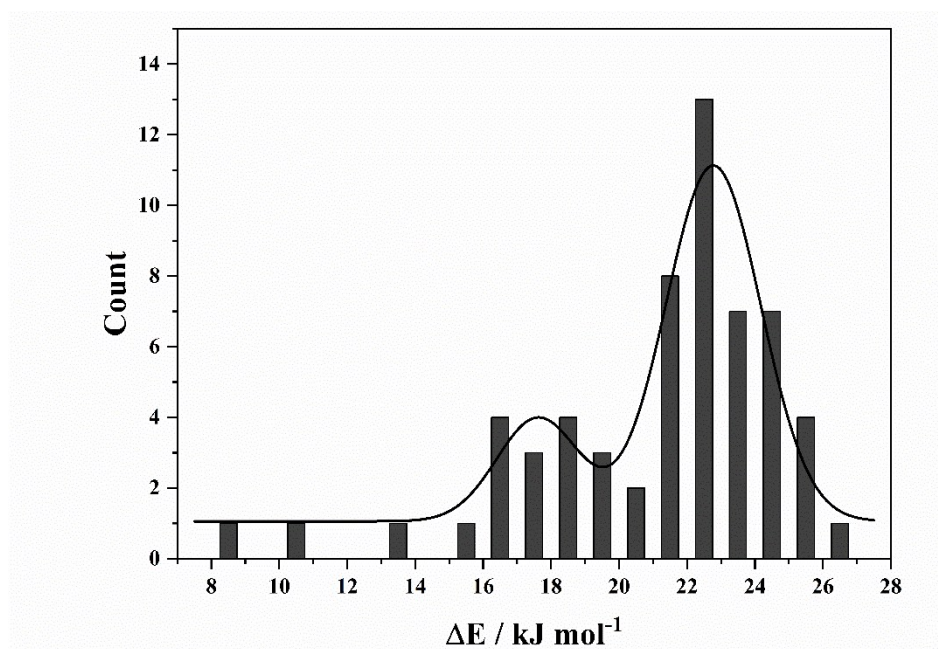

**Fig. S4.** Distribution plot of stabilization energy per methanol molecule for cluster sizes up to six. Note the bimodal distribution in the stabilization energies.



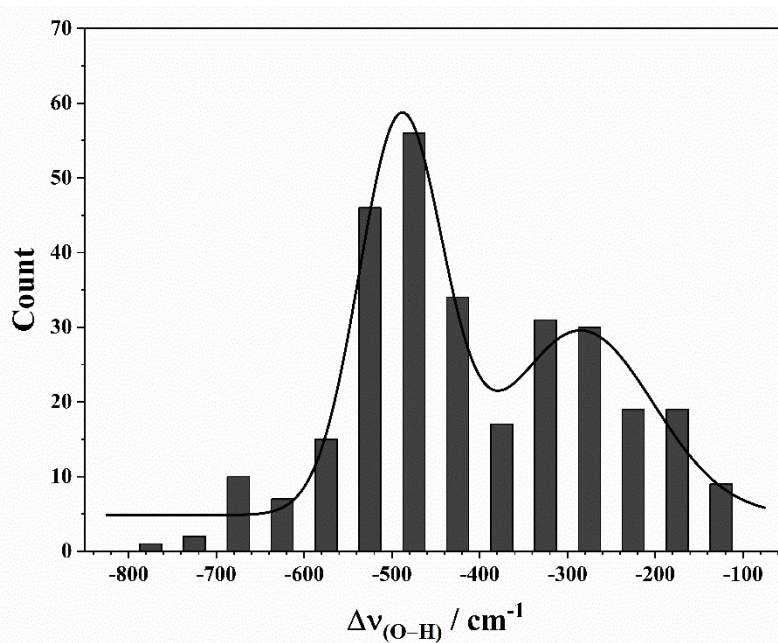

**Fig. S5.** Distribution plot of shifts (unscaled) in the hydrogen bonded O–H stretching frequencies for all the methanol clusters considered. Note the bimodal distribution in the frequency shifts.

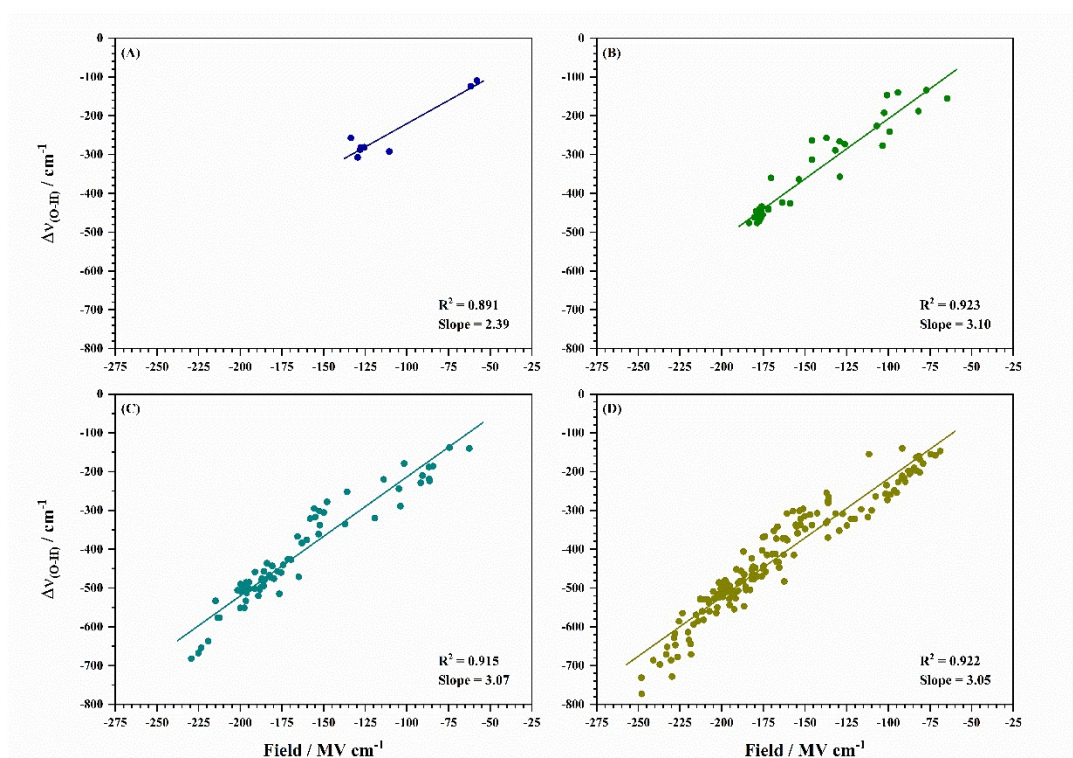

**Fig. S6.** Plot of the red-shift in the O–H stretching frequencies against the corresponding electric fields for (A) trimer, (B) tetramer, (C) pentamer and (D) hexamer. The straight lines are linear fits to the data

points with Stark tuning rates of 2.39, 3.10, 3.07 and 3.05  $\text{cm}^{-1} (\text{MV cm}^{-1})^{-1}$  and residuals 46, 85, 89 and 114  $\text{cm}^{-1}$ , for trimer, tetramer, pentamer and hexamer, respectively.

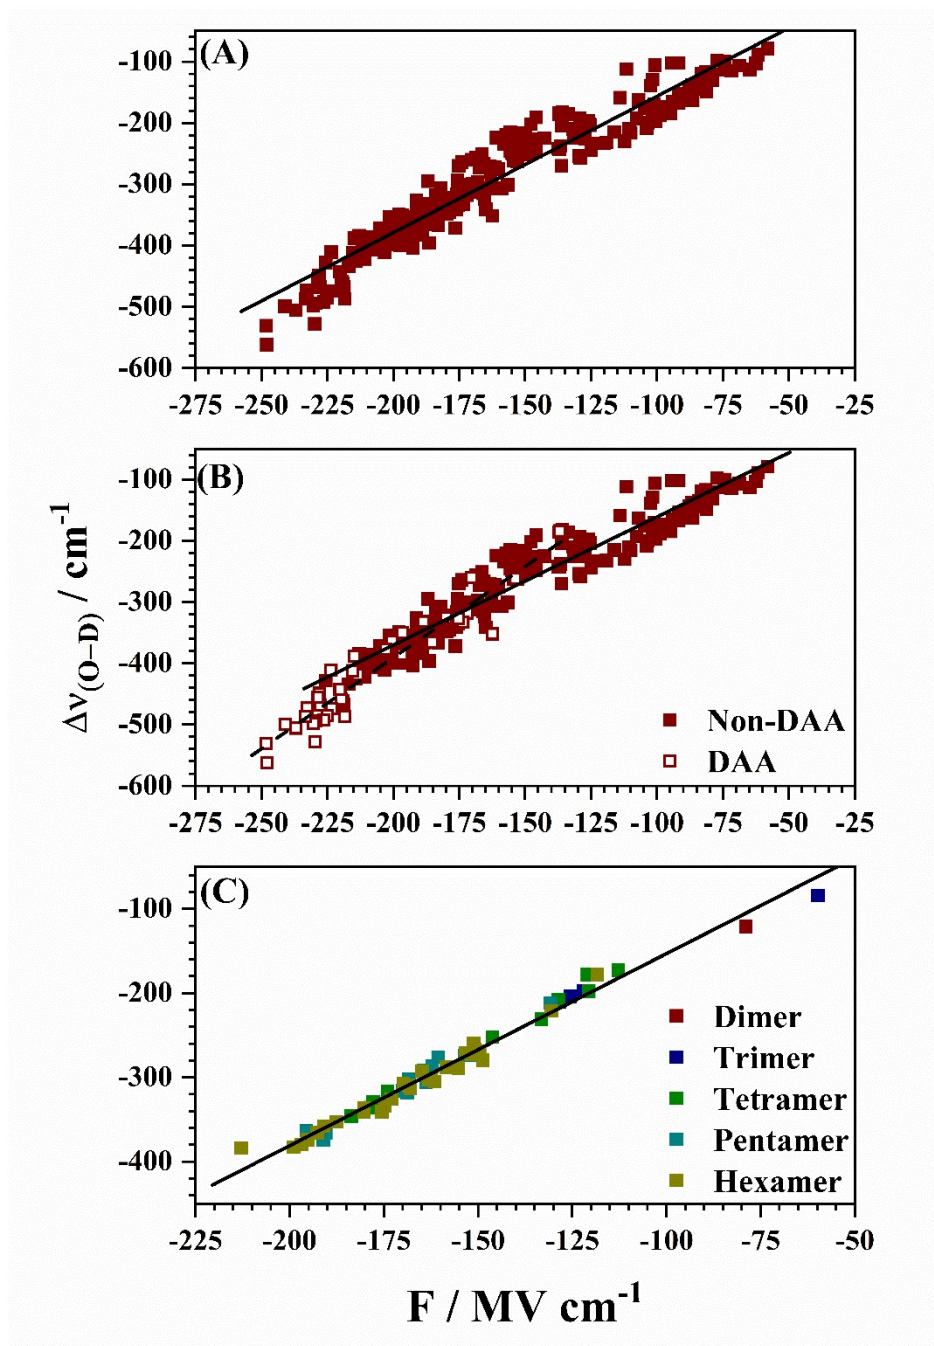

**Fig. S7.** (A) Plot of the red-shift in the individual O–D stretching frequencies against the corresponding electric fields. The solid is a linear fit to the data points with  $R^2$  value of 0.927 with slope of 2.23 and residuals of 82  $\text{cm}^{-1}$ . (B) Plot of the red-shift in the individual O–D stretching frequencies against the corresponding electric fields for non-DAA (solid circles) and DAA (open circles). The solid and dashed lines are linear fits to the non-DAA and DAA data points with  $R^2$  value, slope and residuals of 0.925, 2.09, 73  $\text{cm}^{-1}$  and 0.903, 2.97, 73  $\text{cm}^{-1}$ , respectively. (C) Plot of the average red-shift in the O–D stretching frequency for each cluster

against the average electric field. The solid line is a linear fit to the data points with  $R^2$  value of 0.980 with slope of 2.28 and residuals of  $26 \text{ cm}^{-1}$ .

**Table S1** ZPE and BSSE corrected stabilization energies (kJ mol<sup>-1</sup>), total OH only and total OH + CH electric fields and average OH electric field (MV cm<sup>-1</sup>) for neutral methanol clusters (n=2-6) calculated at MP2/aug-cc-pVDZ level of theory. Vibrational frequency shifts listed in Columns (a) and (b) are the average of selectively labelled hydrogen bonded O–H group in the deuterated methanol cluster and O–D group in the methanol cluster at the same level of theory.

| Structure | $\Delta E$ | Total field |                 | Average                                    | Average                                    | Average OH Field |
|-----------|------------|-------------|-----------------|--------------------------------------------|--------------------------------------------|------------------|
|           |            | OH only     | OH + CH         | $ \Delta\nu_{\text{O-H}} _{\text{H-bond}}$ | $ \Delta\nu_{\text{O-D}} _{\text{H-bond}}$ |                  |
| MeOH2     | -16.0      | -78.90      | -78.90          | 167                                        | 121                                        | -78.90           |
| MeOH3_1   | -49.7      | -464.07     | -464.07         | 292                                        | 211                                        | -128.39          |
| MeOH3_2   | -46.6      | -376.53     | -376.53         | 281                                        | 204                                        | -125.51          |
| MeOH3_3   | -41.5      | -244.16     | <b>-293.46</b>  | 275                                        | 198                                        | -122.08          |
| MeOH3_4   | -30.2      | -119.67     | -119.67         | 116                                        | 84                                         | -59.84           |
| MeOH4_1   | -93.4      | -734.37     | -734.37         | 476                                        | 346                                        | -183.59          |
| MeOH4_2   | -89.0      | -713.95     | -713.95         | 462                                        | 336                                        | -178.49          |
| MeOH4_3   | -88.4      | -711.50     | -711.50         | 453                                        | 329                                        | -177.88          |
| MeOH4_4   | -88.2      | -709.16     | -709.16         | 456                                        | 331                                        | -177.29          |
| MeOH4_5   | -84.0      | -696.15     | -696.15         | 436                                        | 317                                        | -174.04          |
| MeOH4_6   | -72.6      | -514.54     | <b>-562.17</b>  | 287                                        | 208                                        | -128.64          |
| MeOH4_7   | -69.9      | -438.56     | <b>-498.95</b>  | 348                                        | 252                                        | -146.19          |
| MeOH4_8   | -69.7      | -482.48     | -482.48         | 274                                        | 198                                        | -120.62          |
| MeOH4_9   | -69.7      | -482.55     | -482.55         | 274                                        | 198                                        | -120.64          |
| MeOH4_10  | -66.1      | -483.74     | -483.74         | 246                                        | 178                                        | -120.94          |
| MeOH4_11  | -65.5      | -399.56     | <b>-437.26</b>  | 320                                        | 231                                        | -133.19          |
| MeOH4_12  | -64.7      | -450.99     | -450.99         | 239                                        | 173                                        | -112.75          |
| MeOH5_1   | -122.8     | -955.18     | -955.18         | 503                                        | 374                                        | -191.04          |
| MeOH5_2   | -122.0     | -951.97     | -951.97         | 504                                        | 366                                        | -190.39          |
| MeOH5_3   | -121.1     | -977.65     | -977.65         | 499                                        | 363                                        | -195.53          |
| MeOH5_4   | -114.7     | -841.84     | <b>-897.90</b>  | 416                                        | 302                                        | -168.37          |
| MeOH5_5   | -114.1     | -849.70     | -849.70         | 435                                        | 316                                        | -169.94          |
| MeOH5_6   | -111.3     | -843.74     | -843.74         | 437                                        | 318                                        | -168.75          |
| MeOH5_7   | -110.9     | -822.61     | -822.61         | 402                                        | 292                                        | -164.52          |
| MeOH5_8   | -109.3     | -803.08     | -803.08         | 381                                        | 276                                        | -160.62          |
| MeOH5_9   | -109.1     | -810.76     | -810.76         | 394                                        | 287                                        | -162.15          |
| MeOH5_10  | -107.6     | -819.17     | -819.17         | 420                                        | 306                                        | -163.83          |
| MeOH5_11  | -102.6     | -768.20     | -768.20         | 376                                        | 274                                        | -153.64          |
| MeOH5_12  | -96.2      | -653.93     | -653.93         | 293                                        | 212                                        | -130.79          |
| MeOH5_13  | -92.2      | -602.33     | <b>-645.72</b>  | 378                                        | 274                                        | -150.58          |
| MeOH5_14  | -91.9      | -599.72     | <b>-644.93</b>  | 377                                        | 273                                        | -149.93          |
| MeOH6_1   | -156.5     | -1277.19    | -1277.19        | 528                                        | 384                                        | -212.86          |
| MeOH6_2   | -153.3     | -1193.73    | -1193.73        | 526                                        | 383                                        | -198.96          |
| MeOH6_3   | -153.2     | -1182.48    | -1182.48        | 521                                        | 380                                        | -196.91          |
| MeOH6_4   | -151.4     | -1171.22    | -1171.22        | 514                                        | 374                                        | -195.20          |
| MeOH6_5   | -150.4     | -1156.36    | -1156.36        | 504                                        | 366                                        | -192.73          |
| MeOH6_6   | -149.8     | -1145.45    | -1145.45        | 492                                        | 358                                        | -190.91          |
| MeOH6_7   | -147.5     | -1125.56    | <b>-1172.63</b> | 485                                        | 353                                        | -187.59          |
| MeOH6_8   | -146.9     | -1081.75    | <b>-1131.01</b> | 468                                        | 341                                        | -180.29          |
| MeOH6_9   | -144.9     | -1081.98    | <b>-1090.66</b> | 462                                        | 337                                        | -180.33          |

|          |        |          |                 |     |     |         |
|----------|--------|----------|-----------------|-----|-----|---------|
| MeOH6_10 | -142.5 | -1048.22 | -1048.22        | 459 | 334 | -174.70 |
| MeOH6_11 | -142.4 | -1053.17 | -1053.17        | 467 | 341 | -175.53 |
| MeOH6_12 | -140.5 | -1008.00 | <b>-1070.72</b> | 430 | 313 | -168.00 |
| MeOH6_13 | -139.6 | -1019.34 | <b>-1128.60</b> | 422 | 307 | -169.89 |
| MeOH6_14 | -139.5 | -1010.03 | <b>-1130.95</b> | 427 | 310 | -168.34 |
| MeOH6_15 | -138.4 | -989.21  | -989.21         | 404 | 293 | -164.87 |
| MeOH6_16 | -137.7 | -978.96  | <b>-1014.76</b> | 417 | 303 | -163.16 |
| MeOH6_17 | -137.1 | -974.37  | -974.37         | 417 | 303 | -162.39 |
| MeOH6_18 | -135.6 | -906.91  | <b>-1000.43</b> | 358 | 260 | -151.15 |
| MeOH6_19 | -135.5 | -949.79  | -949.79         | 395 | 288 | -158.30 |
| MeOH6_20 | -134.0 | -919.44  | <b>-990.99</b>  | 374 | 271 | -153.24 |
| MeOH6_21 | -133.6 | -905.80  | <b>-951.31</b>  | 368 | 267 | -150.97 |
| MeOH6_22 | -130.5 | -931.23  | <b>-970.99</b>  | 397 | 289 | -155.20 |
| MeOH6_23 | -128.5 | -897.55  | <b>-941.23</b>  | 370 | 269 | -149.59 |
| MeOH6_24 | -128.2 | -892.68  | -892.68         | 384 | 280 | -148.78 |
| MeOH6_25 | -126.3 | -864.90  | -864.90         | 450 | 326 | -172.98 |
| MeOH6_26 | -123.0 | -807.74  | <b>-899.41</b>  | 419 | 305 | -161.55 |
| MeOH6_27 | -117.5 | -758.84  | <b>-837.80</b>  | 377 | 273 | -151.77 |
| MeOH6_28 | -115.7 | -783.02  | <b>-875.90</b>  | 305 | 221 | -130.50 |
| MeOH6_29 | -113.3 | -709.78  | <b>-770.12</b>  | 246 | 178 | -118.30 |

**Table S2** Unscaled vibrational frequencies ( $\text{cm}^{-1}$ ) listed in Columns (a) and (b) are the selectively labelled hydrogen bonded O–H group in the deuterated methanol cluster and O–D group in the methanol cluster with their corresponding shifts and electric field ( $\text{MV cm}^{-1}$ ) calculated at the MP2/aug-cc-pVDZ level of theory. The entries in red are due to DAA configuration.

| Structure | $\nu_{\text{O-H}} _{\text{H-bond}}$<br>(a) | $\Delta\nu_{\text{O-H}} _{\text{H-bond}}$ | $\nu_{\text{O-D}} _{\text{H-bond}}$<br>(b) | $\Delta\nu_{\text{O-D}} _{\text{H-bond}}$ | Elec. Field |
|-----------|--------------------------------------------|-------------------------------------------|--------------------------------------------|-------------------------------------------|-------------|
| MeOH      | 3843                                       |                                           | 2798                                       |                                           |             |
| MeOH2     | 3675                                       | -167                                      | 2677                                       | -121                                      | -78.90      |
| MeOH3_1   | 3536                                       | -307                                      | 2576                                       | -222                                      | -129.56     |
|           | 3555                                       | -287                                      | 2590                                       | -208                                      | -127.96     |
|           | 3560                                       | -282                                      | 2593                                       | -205                                      | -127.65     |
| MeOH3_2   | 3561                                       | -282                                      | 2594                                       | -204                                      | -125.50     |
|           | 3562                                       | -281                                      | 2595                                       | -203                                      | -125.52     |
|           | 3561                                       | -281                                      | 2594                                       | -204                                      | -125.52     |
| MeOH3_3   | 3550                                       | -292                                      | 2587                                       | -210                                      | -110.58     |
|           | 3586                                       | -257                                      | 2612                                       | -186                                      | -133.58     |
| MeOH3_4   | 3719                                       | -124                                      | 2709                                       | -89                                       | -61.66      |
|           | 3734                                       | -109                                      | 2719                                       | -79                                       | -58.02      |
| MeOH4_1   | 3366                                       | -476                                      | 2452                                       | -346                                      | -183.59     |
|           | 3367                                       | -476                                      | 2452                                       | -346                                      | -183.57     |
|           | 3366                                       | -476                                      | 2452                                       | -346                                      | -183.60     |
|           | 3366                                       | -476                                      | 2452                                       | -346                                      | -183.61     |
| MeOH4_2   | 3394                                       | -449                                      | 2471                                       | -327                                      | -178.20     |
|           | 3366                                       | -476                                      | 2453                                       | -345                                      | -178.77     |
|           | 3394                                       | -448                                      | 2471                                       | -327                                      | -178.20     |
|           | 3366                                       | -476                                      | 2452                                       | -346                                      | -178.78     |
| MeOH4_3   | 3397                                       | -446                                      | 2474                                       | -324                                      | -179.35     |
|           | 3402                                       | -441                                      | 2476                                       | -322                                      | -177.55     |
|           | 3371                                       | -472                                      | 2456                                       | -342                                      | -177.62     |
|           | 3388                                       | -455                                      | 2468                                       | -330                                      | -176.99     |
| MeOH4_4   | 3379                                       | -464                                      | 2462                                       | -336                                      | -176.56     |
|           | 3381                                       | -462                                      | 2462                                       | -336                                      | -180.30     |



|          |             |             |             |             |                |
|----------|-------------|-------------|-------------|-------------|----------------|
|          | 3386        | -457        | 2466        | -332        | -176.12        |
|          | 3401        | -441        | 2476        | -322        | -176.18        |
| MeOH4_5  | 3409        | -434        | 2482        | -316        | -175.95        |
|          | 3405        | -438        | 2480        | -318        | -172.13        |
|          | 3409        | -434        | 2482        | -316        | -175.94        |
|          | 3405        | -438        | 2480        | -318        | -172.13        |
| MeOH4_6  | 3703        | -140        | 2696        | -102        | -94.28         |
|          | 3602        | -241        | 2624        | -174        | -99.12         |
|          | 3530        | -313        | 2571        | -227        | -145.77        |
|          | <b>3388</b> | <b>-455</b> | <b>2471</b> | <b>-327</b> | <b>-175.38</b> |
| MeOH4_7  | 3419        | -424        | 2491        | -307        | -163.63        |
|          | 3580        | -263        | 2607        | -191        | -145.85        |
|          | 3485        | -357        | 2540        | -258        | -129.07        |
| MeOH4_8  | <b>3401</b> | <b>-442</b> | <b>2480</b> | <b>-318</b> | <b>-172.02</b> |
|          | 3655        | -188        | 2661        | -137        | -81.93         |
|          | 3651        | -192        | 2659        | -139        | -102.47        |
|          | 3570        | -273        | 2601        | -197        | -126.06        |
| MeOH4_9  | <b>3401</b> | <b>-442</b> | <b>2480</b> | <b>-318</b> | <b>-172.04</b> |
|          | 3654        | -188        | 2661        | -137        | -81.95         |
|          | 3650        | -192        | 2659        | -139        | -102.48        |
|          | 3570        | -273        | 2600        | -198        | -126.08        |
| MeOH4_10 | 3576        | -266        | 2605        | -193        | -129.20        |
|          | 3709        | -134        | 2700        | -98         | -77.20         |
|          | <b>3483</b> | <b>-360</b> | <b>2538</b> | <b>-260</b> | <b>-170.36</b> |
|          | 3617        | -226        | 2635        | -163        | -106.98        |
| MeOH4_11 | 3566        | -277        | 2598        | -200        | -103.51        |
|          | 3417        | -426        | 2491        | -307        | -158.91        |
|          | 3586        | -257        | 2612        | -186        | -137.14        |
| MeOH4_12 | 3696        | -147        | 2691        | -106        | -100.82        |
|          | 3554        | -289        | 2588        | -210        | -131.80        |
|          | <b>3478</b> | <b>-364</b> | <b>2536</b> | <b>-262</b> | <b>-153.59</b> |
|          | 3688        | -155        | 2685        | -113        | -64.78         |
| MeOH5_1  | 3351        | -491        | 2400        | -398        | -199.32        |
|          | 3322        | -520        | 2420        | -378        | -189.09        |
|          | 3366        | -476        | 2450        | -348        | -186.98        |
|          | 3292        | -551        | 2399        | -399        | -199.98        |
|          | 3366        | -476        | 2450        | -348        | -179.82        |
| MeOH5_2  | 3341        | -502        | 2432        | -366        | -194.66        |
|          | 3291        | -551        | 2398        | -400        | -197.62        |
|          | 3339        | -504        | 2432        | -366        | -188.34        |
|          | 3383        | -460        | 2463        | -335        | -175.53        |
|          | 3341        | -501        | 2433        | -365        | -195.81        |
| MeOH5_3  | 3352        | -490        | 2440        | -358        | -199.91        |
|          | 3341        | -502        | 2434        | -364        | -191.22        |
|          | 3343        | -500        | 2435        | -363        | -199.02        |
|          | 3348        | -495        | 2438        | -360        | -185.95        |
|          | 3336        | -506        | 2430        | -368        | -201.55        |
| MeOH5_4  | 3329        | -513        | 2425        | -373        | -196.21        |
|          | <b>3266</b> | <b>-577</b> | <b>2380</b> | <b>-418</b> | <b>-213.53</b> |
|          | 3521        | -321        | 2564        | -234        | -158.08        |
|          | 3362        | -480        | 2449        | -349        | -187.15        |
|          | 3654        | -188        | 2660        | -138        | -86.87         |
| MeOH5_5  | <b>3189</b> | <b>-654</b> | <b>2324</b> | <b>-474</b> | <b>-223.45</b> |
|          | 3537        | -305        | 2575        | -223        | -149.92        |
|          | 3364        | -478        | 2451        | -347        | -185.20        |
|          | 3333        | -509        | 2426        | -372        | -199.42        |
|          | 3614        | -229        | 2631        | -167        | -91.71         |

|          |             |             |             |             |                |
|----------|-------------|-------------|-------------|-------------|----------------|
| MeOH5_6  | 3459        | -384        | 2517        | -280        | -163.01        |
|          | 3386        | -457        | 2467        | -331        | -177.74        |
|          | 3383        | -459        | 2463        | -335        | -191.20        |
|          | <b>3174</b> | <b>-668</b> | <b>2313</b> | <b>-485</b> | <b>-225.14</b> |
|          | 3624        | -219        | 2638        | -160        | -86.64         |
| MeOH5_7  | <b>3161</b> | <b>-682</b> | <b>2304</b> | <b>-494</b> | <b>-229.35</b> |
|          | 3633        | -210        | 2645        | -153        | -90.64         |
|          | 3505        | -338        | 2553        | -245        | -152.28        |
|          | 3357        | -485        | 2444        | -354        | -194.74        |
|          | 3547        | -295        | 2583        | -215        | -155.60        |
| MeOH5_8  | 3525        | -317        | 2568        | -230        | -154.89        |
|          | 3476        | -367        | 2532        | -266        | -165.66        |
|          | 3386        | -457        | 2465        | -333        | -185.85        |
|          | <b>3265</b> | <b>-577</b> | <b>2380</b> | <b>-418</b> | <b>-212.39</b> |
|          | 3657        | -186        | 2663        | -135        | -84.29         |
| MeOH5_9  | 3399        | -443        | 2476        | -322        | -180.87        |
|          | 3345        | -498        | 2437        | -361        | -187.67        |
|          | <b>3310</b> | <b>-533</b> | <b>2410</b> | <b>-388</b> | <b>-214.87</b> |
|          | 3482        | -361        | 2535        | -263        | -152.97        |
|          | 3705        | -138        | 2698        | -100        | -74.38         |
| MeOH5_10 | <b>3206</b> | <b>-637</b> | <b>2336</b> | <b>-462</b> | <b>-219.26</b> |
|          | 3467        | -376        | 2523        | -275        | -160.11        |
|          | 3416        | -427        | 2488        | -309        | -169.51        |
|          | 3406        | -436        | 2480        | -318        | -183.91        |
|          | 3618        | -224        | 2635        | -163        | -86.40         |
| MeOH5_11 | 3375        | -467        | 2457        | -340        | -182.41        |
|          | <b>3310</b> | <b>-533</b> | <b>2413</b> | <b>-385</b> | <b>-196.66</b> |
|          | 3541        | -302        | 2578        | -220        | -152.48        |
|          | 3402        | -440        | 2479        | -319        | -174.14        |
|          | 3702        | -140        | 2695        | -103        | -62.51         |
| MeOH5_12 | <b>3357</b> | <b>-486</b> | <b>2448</b> | <b>-350</b> | <b>-196.45</b> |
|          | 3507        | -335        | 2555        | -243        | -137.08        |
|          | 3664        | -179        | 2669        | -129        | -101.64        |
|          | 3623        | -220        | 2638        | -159        | -113.98        |
|          | 3599        | -244        | 2622        | -176        | -104.78        |
| MeOH5_13 | 3372        | -471        | 2457        | -341        | -164.86        |
|          | 3372        | -471        | 2457        | -341        | -182.42        |
|          | 3591        | -252        | 2616        | -182        | -135.84        |
|          | 3522        | -320        | 2566        | -232        | -119.20        |
|          | MeOH5_14    | 3417        | -426        | 2489        | -309           |
| 3565     |             | -278        | 2596        | -202        | -147.87        |
| 3328     |             | -515        | 2426        | -372        | -176.51        |
| 3553     |             | -289        | 2589        | -209        | -103.89        |
| MeOH6_1  |             | 3314        | -528        | 2414        | -384           |
|          | 3315        | -528        | 2414        | -384        | -212.82        |
|          | 3314        | -529        | 2413        | -385        | -212.86        |
|          | 3314        | -529        | 2413        | -384        | -212.84        |
|          | 3314        | -529        | 2414        | -384        | -212.90        |
|          | 3314        | -529        | 2414        | -384        | -212.90        |
|          | MeOH6_2     | 3314        | -528        | 2414        | -384           |
| 3315     |             | -527        | 2415        | -383        | -191.67        |
| 3319     |             | -523        | 2417        | -381        | -199.31        |
| 3261     |             | -582        | 2376        | -422        | -210.89        |
| 3377     |             | -465        | 2459        | -339        | -186.40        |
| 3314     |             | -529        | 2412        | -386        | -210.10        |
| MeOH6_3  |             | 3374        | -468        | 2456        | -342           |
|          | 3314        | -528        | 2413        | -385        | -204.59        |

|          |             |             |             |             |                |
|----------|-------------|-------------|-------------|-------------|----------------|
|          | 3343        | -499        | 2434        | -364        | -197.97        |
|          | 3288        | -555        | 2394        | -404        | -192.52        |
|          | 3326        | -517        | 2423        | -375        | -192.61        |
|          | 3281        | -561        | 2390        | -408        | -211.81        |
| MeOH6_4  | 3376        | -467        | 2457        | -341        | -179.63        |
|          | 3282        | -560        | 2391        | -407        | -211.47        |
|          | 3329        | -514        | 2425        | -373        | -199.40        |
|          | 3278        | -564        | 2387        | -411        | -203.24        |
|          | 3343        | -499        | 2433        | -365        | -195.56        |
|          | 3366        | -477        | 2451        | -347        | -181.92        |
| MeOH6_5  | 3356        | -487        | 2443        | -355        | -201.58        |
|          | 3338        | -505        | 2431        | -367        | -182.93        |
|          | 3323        | -519        | 2421        | -377        | -193.69        |
|          | 3338        | -505        | 2431        | -367        | -182.94        |
|          | 3323        | -519        | 2421        | -377        | -193.67        |
|          | 3356        | -486        | 2444        | -354        | -201.55        |
| MeOH6_6  | 3393        | -450        | 2471        | -327        | -175.23        |
|          | 3393        | -449        | 2471        | -327        | -175.22        |
|          | 3304        | -539        | 2407        | -391        | -207.54        |
|          | 3356        | -487        | 2443        | -355        | -190.02        |
|          | 3303        | -539        | 2407        | -391        | -207.50        |
|          | 3356        | -487        | 2443        | -355        | -189.95        |
| MeOH6_7  | 3584        | -259        | 2610        | -188        | -98.73         |
|          | 3502        | -341        | 2549        | -249        | -155.01        |
|          | 3363        | -480        | 2449        | -349        | -197.86        |
|          | <b>3157</b> | <b>-686</b> | <b>2299</b> | <b>-499</b> | <b>-241.01</b> |
|          | 3283        | -560        | 2391        | -407        | -207.37        |
|          | 3257        | -586        | 2370        | -428        | -225.58        |
| MeOH6_8  | 3314        | -529        | 2411        | -387        | -208.59        |
|          | <b>3145</b> | <b>-697</b> | <b>2292</b> | <b>-506</b> | <b>-237.03</b> |
|          | 3292        | -550        | 2399        | -399        | -202.68        |
|          | 3397        | -445        | 2475        | -323        | -181.15        |
|          | 3631        | -211        | 2644        | -154        | -91.62         |
|          | 3466        | -377        | 2522        | -276        | -160.67        |
| MeOH6_9  | 3637        | -206        | 2647        | -151        | -87.26         |
|          | 3333        | -509        | 2426        | -372        | -205.08        |
|          | 3327        | -516        | 2424        | -374        | -202.43        |
|          | 3474        | -369        | 2528        | -270        | -175.21        |
|          | <b>3164</b> | <b>-678</b> | <b>2306</b> | <b>-492</b> | <b>-226.31</b> |
|          | 3346        | -496        | 2437        | -361        | -185.68        |
| MeOH6_10 | 3347        | -496        | 2435        | -363        | -199.00        |
|          | 3333        | -509        | 2429        | -369        | -191.07        |
|          | 3366        | -477        | 2450        | -348        | -180.73        |
|          | 3640        | -202        | 2649        | -149        | -81.18         |
|          | 3501        | -342        | 2547        | -251        | -166.48        |
|          | <b>3115</b> | <b>-728</b> | <b>2270</b> | <b>-528</b> | <b>-229.77</b> |
| MeOH6_11 | 3664        | -179        | 2667        | -131        | -79.15         |
|          | <b>3070</b> | <b>-773</b> | <b>2236</b> | <b>-562</b> | <b>-248.01</b> |
|          | 3410        | -433        | 2482        | -315        | -165.86        |
|          | 3249        | -594        | 2364        | -434        | -216.84        |
|          | 3470        | -373        | 2526        | -272        | -161.56        |
|          | 3390        | -452        | 2468        | -330        | -181.74        |
| MeOH6_12 | 3527        | -315        | 2567        | -231        | -150.17        |
|          | 3400        | -443        | 2477        | -321        | -174.80        |
|          | <b>3111</b> | <b>-731</b> | <b>2267</b> | <b>-531</b> | <b>-248.13</b> |
|          | 3570        | -273        | 2601        | -197        | -100.47        |
|          | 3357        | -486        | 2444        | -354        | -197.12        |

|          |             |             |             |             |                |
|----------|-------------|-------------|-------------|-------------|----------------|
|          | 3511        | -332        | 2556        | -242        | -137.31        |
| MeOH6_13 | 3483        | -359        | 2536        | -262        | -154.49        |
|          | <b>3278</b> | <b>-565</b> | <b>2387</b> | <b>-411</b> | <b>-223.53</b> |
|          | 3329        | -513        | 2425        | -373        | -193.21        |
|          | 3503        | -339        | 2553        | -244        | -124.90        |
|          | 3361        | -481        | 2448        | -349        | -187.09        |
|          | 3568        | -274        | 2597        | -200        | -136.14        |
| MeOH6_14 | 3318        | -524        | 2415        | -383        | -201.54        |
|          | 3535        | -307        | 2573        | -225        | -142.74        |
|          | 3491        | -352        | 2544        | -254        | -129.41        |
|          | <b>3172</b> | <b>-671</b> | <b>2311</b> | <b>-487</b> | <b>-218.39</b> |
|          | 3419        | -424        | 2491        | -307        | -181.93        |
|          | 3562        | -281        | 2593        | -205        | -136.03        |
| MeOH6_15 | <b>3274</b> | <b>-569</b> | <b>2386</b> | <b>-412</b> | <b>-215.32</b> |
|          | 3540        | -302        | 2578        | -220        | -157.22        |
|          | 3608        | -235        | 2628        | -170        | -101.05        |
|          | 3515        | -328        | 2560        | -238        | -136.51        |
|          | 3335        | -507        | 2429        | -369        | -190.08        |
|          | 3360        | -483        | 2448        | -350        | -189.03        |
| MeOH6_16 | 3473        | -370        | 2528        | -270        | -136.26        |
|          | 3372        | -471        | 2456        | -342        | -179.09        |
|          | 3429        | -413        | 2498        | -300        | -169.81        |
|          | <b>3191</b> | <b>-652</b> | <b>2325</b> | <b>-473</b> | <b>-232.74</b> |
|          | 3547        | -296        | 2582        | -216        | -151.10        |
|          | 3543        | -300        | 2582        | -216        | -109.96        |
| MeOH6_17 | 3411        | -432        | 2485        | -313        | -167.19        |
|          | 3502        | -340        | 2548        | -250        | -154.82        |
|          | <b>3199</b> | <b>-644</b> | <b>2331</b> | <b>-467</b> | <b>-218.67</b> |
|          | 3388        | -454        | 2468        | -330        | -181.87        |
|          | 3520        | -322        | 2565        | -233        | -120.19        |
|          | 3535        | -308        | 2573        | -225        | -131.63        |
| MeOH6_18 | 3624        | -219        | 2639        | -159        | -90.72         |
|          | <b>3214</b> | <b>-628</b> | <b>2343</b> | <b>-455</b> | <b>-228.51</b> |
|          | 3674        | -168        | 2676        | -122        | -81.10         |
|          | 3532        | -311        | 2572        | -226        | -146.98        |
|          | 3436        | -406        | 2503        | -295        | -186.86        |
|          | 3428        | -415        | 2497        | -301        | -172.75        |
| MeOH6_19 | 3521        | -322        | 2563        | -235        | -152.62        |
|          | <b>3386</b> | <b>-456</b> | <b>2466</b> | <b>-332</b> | <b>-188.45</b> |
|          | <b>3172</b> | <b>-671</b> | <b>2311</b> | <b>-487</b> | <b>-233.18</b> |
|          | 3627        | -216        | 2641        | -157        | -90.61         |
|          | 3645        | -198        | 2654        | -144        | -87.87         |
|          | 3333        | -510        | 2427        | -371        | -197.06        |
| MeOH6_20 | 3653        | -190        | 2660        | -138        | -84.46         |
|          | 3506        | -337        | 2553        | -245        | -152.89        |
|          | <b>3340</b> | <b>-502</b> | <b>2434</b> | <b>-364</b> | <b>-200.54</b> |
|          | <b>3229</b> | <b>-614</b> | <b>2354</b> | <b>-443</b> | <b>-220.22</b> |
|          | 3470        | -373        | 2525        | -273        | -167.25        |
|          | 3615        | -227        | 2633        | -165        | -94.08         |
| MeOH6_21 | <b>3394</b> | <b>-448</b> | <b>2472</b> | <b>-326</b> | <b>-179.87</b> |
|          | 3683        | -160        | 2681        | -117        | -81.58         |
|          | 3471        | -372        | 2526        | -271        | -163.30        |
|          | <b>3323</b> | <b>-520</b> | <b>2421</b> | <b>-377</b> | <b>-202.75</b> |
|          | 3298        | -544        | 2404        | -394        | -195.20        |
|          | 3680        | -163        | 2679        | -119        | -83.09         |
| MeOH6_22 | <b>3226</b> | <b>-617</b> | <b>2349</b> | <b>-449</b> | <b>-228.10</b> |
|          | 3504        | -338        | 2550        | -248        | -145.80        |

|          |             |             |             |             |                |
|----------|-------------|-------------|-------------|-------------|----------------|
|          | 3534        | -309        | 2572        | -226        | -127.32        |
|          | 3586        | -257        | 2612        | -186        | -101.76        |
|          | 3396        | -447        | 2474        | -324        | -165.45        |
|          | 3429        | -414        | 2498        | -300        | -162.80        |
| MeOH6_23 | <b>3337</b> | <b>-505</b> | <b>2432</b> | <b>-366</b> | <b>-185.36</b> |
|          | 3541        | -301        | 2580        | -218        | -153.36        |
|          | <b>3208</b> | <b>-634</b> | <b>2339</b> | <b>-459</b> | <b>-219.63</b> |
|          | 3624        | -218        | 2639        | -159        | -91.70         |
|          | 3684        | -158        | 2682        | -115        | -71.78         |
|          | 3439        | -403        | 2504        | -294        | -175.72        |
| MeOH6_24 | 3505        | -337        | 2552        | -246        | -155.53        |
|          | 3695        | -147        | 2691        | -107        | -68.83         |
|          | <b>3360</b> | <b>-483</b> | <b>2446</b> | <b>-352</b> | <b>-162.40</b> |
|          | 3645        | -198        | 2654        | -144        | -83.16         |
|          | <b>3196</b> | <b>-647</b> | <b>2330</b> | <b>-468</b> | <b>-227.80</b> |
|          | 3348        | -495        | 2438        | -360        | -194.98        |
| MeOH6_25 | 3525        | -317        | 2568        | -230        | -112.28        |
|          | 3295        | -547        | 2402        | -396        | -186.47        |
|          | 3332        | -511        | 2426        | -372        | -197.65        |
|          | 3322        | -521        | 2420        | -378        | -199.78        |
|          | 3490        | -353        | 2542        | -256        | -168.73        |
| MeOH6_26 | 3258        | -585        | 2373        | -425        | -214.02        |
|          | <b>3156</b> | <b>-686</b> | <b>2300</b> | <b>-498</b> | <b>-230.37</b> |
|          | 3579        | -264        | 2605        | -193        | -107.64        |
|          | 3535        | -308        | 2574        | -224        | -160.85        |
|          | 3825        | -17         | 2785        | -13         | -40.75         |
|          | 3589        | -254        | 2613        | -185        | -94.86         |
| MeOH6_27 | 3427        | -415        | 2497        | -301        | -156.60        |
|          | 3372        | -470        | 2457        | -341        | -176.03        |
|          | 3430        | -412        | 2501        | -297        | -167.95        |
|          | 3577        | -266        | 2605        | -193        | -135.87        |
|          | 3521        | -322        | 2565        | -233        | -122.38        |
| MeOH6_28 | 3702        | -140        | 2696        | -102        | -91.70         |
|          | <b>3385</b> | <b>-458</b> | <b>2465</b> | <b>-333</b> | <b>-173.55</b> |
|          | 3639        | -204        | 2650        | -148        | -86.83         |
|          | 3391        | -452        | 2472        | -326        | -191.20        |
|          | 3494        | -348        | 2546        | -252        | -149.89        |
|          | 3616        | -226        | 2635        | -163        | -89.86         |
| MeOH6_29 | 3595        | -248        | 2619        | -179        | -96.43         |
|          | 3545        | -297        | 2583        | -215        | -116.23        |
|          | 3688        | -155        | 2686        | -112        | -111.57        |
|          | 3476        | -367        | 2534        | -264        | -174.08        |
|          | 3688        | -155        | 2685        | -113        | -74.46         |
|          | <b>3587</b> | <b>-255</b> | <b>2614</b> | <b>-184</b> | <b>-137.01</b> |



**Cartesian coordinates of neutral methanol clusters optimized at the MP2/aug-cc-pVDZ level of theory**

|                                                                                                                                                                                                                                                                                                                                                                                                                                                                                                                                                                                                                                                                                                                                                       |                                                                                                                                                                                                                                                                                                                                                                                                                                                                                                                                                                                                                                                                                                                                                        |
|-------------------------------------------------------------------------------------------------------------------------------------------------------------------------------------------------------------------------------------------------------------------------------------------------------------------------------------------------------------------------------------------------------------------------------------------------------------------------------------------------------------------------------------------------------------------------------------------------------------------------------------------------------------------------------------------------------------------------------------------------------|--------------------------------------------------------------------------------------------------------------------------------------------------------------------------------------------------------------------------------------------------------------------------------------------------------------------------------------------------------------------------------------------------------------------------------------------------------------------------------------------------------------------------------------------------------------------------------------------------------------------------------------------------------------------------------------------------------------------------------------------------------|
| <b>MeOH</b><br>C 0.67255400 -0.02009800 0.00000000<br>O -0.75529900 0.12250400 0.00000000<br>H -1.14214600 -0.76229900 0.00001000<br>H 1.08381100 0.99739000 -0.00031200<br>H 1.03267600 -0.54753400 -0.89931800<br>H 1.03272300 -0.54699800 0.89961600                                                                                                                                                                                                                                                                                                                                                                                                                                                                                               | <b>MeOH2</b><br>C 2.03080900 0.51052100 0.18555800<br>O 1.32896700 -0.73756000 0.00043000<br>H 1.75371000 -1.21612900 -0.72410200<br>H 1.52331100 1.02509100 1.01034200<br>H 1.97600700 1.14091300 -0.71575900<br>H 3.08305300 0.33728500 0.45935700<br>H -0.41803700 -0.14550000 -0.39889500<br>O -1.23654800 0.34882000 -0.58332900<br>C -2.22312200 -0.08722700 0.35434400<br>H -3.13343400 0.49628900 0.16037400<br>H -1.90810200 0.09089300 1.39782800<br>H -2.46198900 -1.15868300 0.23464500                                                                                                                                                                                                                                                    |
| <b>MeOH3_1</b><br>C 2.77420600 0.35942600 -0.04667500<br>O 1.44686000 0.24457600 0.48840000<br>H 1.03205200 -0.56309300 0.11558700<br>H 3.20353500 1.28726100 0.35366400<br>H 2.76449200 0.41528600 -1.14796900<br>H 3.40548700 -0.48743500 0.26733300<br>H -0.01005500 1.18362800 -0.18747700<br>O -0.89273800 1.22820500 -0.61243800<br>C -1.80111700 1.83733800 0.31637900<br>H -2.79737400 1.81551700 -0.14495100<br>H -1.52664500 2.88598100 0.51595000<br>H -1.83621300 1.28734200 1.27237800<br>H -0.78711000 -0.64017800 -0.80162400<br>O -0.36777600 -1.51183800 -0.64013800<br>C -1.13445000 -2.16580200 0.38350400<br>H -2.17146900 -2.34339300 0.05542000<br>H -1.14456300 -1.58006900 1.31889400<br>H -0.65474000 -3.13416400 0.57695500 | <b>MeOH3_2</b><br>C -1.89521700 -1.36318000 0.56484300<br>O -1.24390800 -1.02437100 -0.66732000<br>H -1.19365600 -0.04628100 -0.71442400<br>H -1.90302200 -2.45880200 0.63651500<br>H -2.93598700 -1.00050100 0.58216100<br>H -1.35830600 -0.95320300 1.43836100<br>H 0.63882000 -1.01146000 -0.71234200<br>O 1.51055900 -0.56491700 -0.66728900<br>C 2.13053200 -0.95478400 0.56595600<br>H 3.08159300 -0.41065200 0.63662200<br>H 2.34012000 -2.03678000 0.58584200<br>H 1.50596500 -0.69468500 1.43868200<br>H 0.55727100 1.05869600 -0.71633300<br>O -0.26460900 1.59135800 -0.66974000<br>C -0.23706000 2.31634000 0.56758600<br>H 0.59644600 3.03723400 0.59246100<br>H -0.15218300 1.64041600 1.43668100<br>H -1.18292400 2.86919700 0.64026200 |
| <b>MeOH3_3</b><br>C -2.79887200 -0.86154600 -0.06370900<br>O -1.38937300 -0.94768900 0.15321900<br>H -0.98014200 -0.14701600 -0.23620500<br>H -3.25302500 -1.76111400 0.37418900<br>H -3.04806300 -0.83058500 -1.13888100<br>H -3.23746900 0.02559900 0.42725400<br>H -1.10630600 2.66825400 0.34672100<br>C -0.12554200 2.18472600 0.45006900<br>O 0.02725400 1.29986200 -0.67224000<br>H 0.65427900 2.96330700 0.45487400<br>H -0.09578500 1.63329200 1.40473200<br>H 0.90257300 0.87149700 -0.57895300<br>H 0.88336800 -1.50968700 0.52083300<br>C 1.92214300 -1.53117200 0.17079000                                                                                                                                                               | <b>MeOH3_4</b><br>C -1.13456200 1.92610500 -0.52111200<br>O -0.66885800 1.31370800 0.71037100<br>H -0.86632000 1.91238100 1.44321500<br>H -0.85521200 1.23464900 -1.32416700<br>H -0.64217100 2.89589000 -0.68529900<br>H -2.22744800 2.04829100 -0.50671000<br>H 1.07928300 0.72322500 0.14892200<br>O 1.78936200 0.46298500 -0.46124600<br>C 2.65417100 -0.44447600 0.22850500<br>H 3.43462700 -0.74587800 -0.48288500<br>H 2.11756400 -1.34832900 0.56542300<br>H 3.13856700 0.02975900 1.09965900<br>O -1.90115500 -1.23858000 0.16928800<br>C -0.81793300 -2.08746800 -0.22977400                                                                                                                                                                 |

|                |             |             |             |                |             |             |             |
|----------------|-------------|-------------|-------------|----------------|-------------|-------------|-------------|
| O              | 2.30759900  | -0.15392200 | -0.06165800 | H              | -1.50920100 | -0.43887400 | 0.55599600  |
| H              | 2.56524700  | -1.98794800 | 0.93847000  | H              | -1.25628500 | -2.92002300 | -0.79618000 |
| H              | 1.97405200  | -2.11877300 | -0.75860800 | H              | -0.28280100 | -2.50329800 | 0.64261300  |
| H              | 3.19106100  | -0.14487800 | -0.45189600 | H              | -0.09544300 | -1.55765900 | -0.87360900 |
| <b>MeOH4_1</b> |             |             |             | <b>MeOH4_2</b> |             |             |             |
| C              | 2.67298600  | -0.29317600 | 1.23582100  | C              | 1.73298600  | 2.23380100  | 0.30317200  |
| O              | 1.88645100  | -0.29432300 | 0.03460000  | O              | 0.86721400  | 1.60162000  | -0.65361100 |
| H              | 1.39798000  | 0.56545900  | -0.00618400 | H              | 1.16072500  | 0.66028300  | -0.72446600 |
| H              | 3.17541800  | -1.26780100 | 1.29904600  | H              | 1.43095200  | 3.28717600  | 0.37226700  |
| H              | 2.04465500  | -0.15490000 | 2.13169700  | H              | 2.78461800  | 2.18763200  | -0.02289300 |
| H              | 3.43775300  | 0.49940100  | 1.20689100  | H              | 1.64094700  | 1.77119300  | 1.30088500  |
| H              | 0.56541500  | -1.39823700 | 0.00676000  | H              | -0.67274300 | 1.34799800  | 0.08144900  |
| O              | -0.29440200 | -1.88660400 | -0.03421200 | O              | -1.48297700 | 1.04380700  | 0.56137400  |
| C              | -0.29357700 | -2.67208000 | -1.23615100 | C              | -2.62794000 | 1.42381100  | -0.21549300 |
| H              | -1.26839400 | -3.17408600 | -1.29979500 | H              | -3.51709800 | 1.03690900  | 0.30080100  |
| H              | 0.49872000  | -3.43715800 | -1.20790600 | H              | -2.58972600 | 0.99857800  | -1.23290100 |
| H              | -0.15508500 | -2.04298700 | -2.13145500 | H              | -2.71148600 | 2.52004400  | -0.28905700 |
| H              | -2.04363000 | 0.15527700  | 2.13173600  | H              | -1.64039700 | -1.77075100 | -1.30147600 |
| C              | -2.67243100 | 0.29360900  | 1.23620300  | C              | -1.73287400 | -2.23361500 | -0.30392400 |
| O              | -1.88656300 | 0.29418900  | 0.03451500  | O              | -0.86729000 | -1.60184600 | 0.65332100  |
| H              | -3.17443300 | 1.26845000  | 1.29949900  | H              | -1.43102100 | -3.28702900 | -0.37319100 |
| H              | -3.43751600 | -0.49867600 | 1.20785400  | H              | -2.78460000 | -2.18731300 | 0.02181100  |
| H              | -1.39813700 | -0.56563100 | -0.00615800 | H              | -1.16082800 | -0.66055000 | 0.72448300  |
| O              | 0.29409900  | 1.88633400  | -0.03446200 | O              | 1.48308700  | -1.04393700 | -0.56109900 |
| C              | 0.29337000  | 2.67199500  | -1.23627900 | C              | 2.62781600  | -1.42369200 | 0.21625100  |
| H              | -0.56571200 | 1.39788400  | 0.00634800  | H              | 0.67269100  | -1.34816700 | -0.08145300 |
| H              | 1.26795900  | 3.17450500  | -1.29944400 | H              | 3.51711800  | -1.03666300 | -0.29970100 |
| H              | -0.49932300 | 3.43667100  | -1.20824400 | H              | 2.71152000  | -2.51990600 | 0.28990400  |
| H              | 0.15556700  | 2.04297500  | -2.13174300 | H              | 2.58911700  | -0.99841300 | 1.23362000  |
| <b>MeOH4_3</b> |             |             |             | <b>MeOH4_4</b> |             |             |             |
| C              | -0.43093900 | -2.99589200 | -0.16736500 | C              | -3.11411300 | 0.05481400  | -0.71466200 |
| O              | -0.33079300 | -1.73140500 | 0.50831900  | O              | -1.97991000 | 0.11121800  | 0.16446400  |
| H              | 0.53603200  | -1.32941100 | 0.25614400  | H              | -1.44073800 | -0.70621800 | 0.02593400  |
| H              | -1.41542100 | -3.41839500 | 0.07478900  | H              | -3.68941200 | 0.97804100  | -0.56422100 |
| H              | 0.34888800  | -3.69228600 | 0.18005000  | H              | -3.75648400 | -0.80749900 | -0.47507500 |
| H              | -0.34911000 | -2.87680400 | -1.26040400 | H              | -2.80529100 | -0.00684700 | -1.77144900 |
| H              | -0.53943700 | 1.29702900  | -0.84475300 | H              | -0.78390400 | 1.33278400  | -0.09748500 |
| O              | 0.31760000  | 1.78914900  | -0.82769700 | O              | 0.03692800  | 1.87546600  | -0.19858800 |
| C              | 0.34655200  | 2.48572800  | 0.42767500  | C              | 0.43506500  | 2.27878400  | 1.11989200  |
| H              | 1.29988100  | 3.02878600  | 0.48100400  | H              | 1.38561700  | 2.82154400  | 1.02499200  |
| H              | 0.28313400  | 1.78740000  | 1.28105500  | H              | 0.58216600  | 1.40940900  | 1.78446200  |
| H              | -0.47808700 | 3.21350800  | 0.49880800  | H              | -0.31230900 | 2.94910400  | 1.57349800  |
| O              | -1.88621400 | 0.22807500  | -0.52243000 | H              | 2.79407600  | -0.03039800 | 0.60527300  |
| C              | -2.87061400 | 0.67632400  | 0.41963000  | C              | 2.88065100  | -0.08102000 | -0.49433700 |
| H              | -1.41116100 | -0.54297200 | -0.12400200 | O              | 1.59520600  | -0.14907700 | -1.12628900 |
| H              | -3.33852500 | 1.57784300  | 0.00089500  | H              | 3.42856600  | -0.99359900 | -0.76530900 |
| H              | -2.41814000 | 0.92632400  | 1.39454900  | H              | 3.45249500  | 0.79176100  | -0.84938900 |
| H              | -3.65062300 | -0.08699000 | 0.57309000  | H              | 1.09304900  | 0.66350400  | -0.87091100 |
| H              | 2.70215700  | 0.45145900  | 1.31750700  | O              | -0.21124500 | -1.91750300 | -0.12897500 |
| C              | 2.99437000  | -0.05301400 | 0.38063100  | C              | 0.27639000  | -2.18419700 | 1.19510300  |

|                |             |             |             |                |             |             |             |
|----------------|-------------|-------------|-------------|----------------|-------------|-------------|-------------|
| O              | 1.85069700  | -0.41769100 | -0.40454700 | H              | 0.48505300  | -1.38079500 | -0.58038600 |
| H              | 3.53018900  | -0.97884100 | 0.62898400  | H              | -0.47972300 | -2.79370500 | 1.70722400  |
| H              | 3.67081600  | 0.60529900  | -0.18807200 | H              | 0.42703200  | -1.25209500 | 1.76777700  |
| H              | 1.38287900  | 0.41415900  | -0.66222900 | H              | 1.22401200  | -2.74610000 | 1.16419100  |
| <b>MeOH4_5</b> |             |             |             | <b>MeOH4_6</b> |             |             |             |
| C              | 0.07825200  | 2.16818400  | 0.96527300  | C              | 2.17185700  | -1.08801100 | -1.31379600 |
| O              | 0.13993200  | 1.91147400  | -0.44440700 | O              | 2.05917800  | 0.27344000  | -0.84608700 |
| H              | -0.66460100 | 1.38194500  | -0.66465600 | H              | 1.21617200  | 0.63234000  | -1.17558500 |
| H              | 0.97726500  | 2.73786500  | 1.23683300  | H              | 3.06436800  | -1.50969200 | -0.83338500 |
| H              | 0.05968800  | 1.23143600  | 1.55069000  | H              | 2.31118800  | -1.11557800 | -2.40613600 |
| H              | -0.81011100 | 2.76707700  | 1.22415000  | H              | 1.28441400  | -1.67889000 | -1.03985800 |
| H              | 1.34596400  | 0.67646900  | -0.76843500 | H              | -1.09345700 | -0.49140600 | -0.69198900 |
| O              | 1.88920200  | -0.14551100 | -0.83857400 | O              | -1.15757600 | -1.46632800 | -0.66501300 |
| C              | 2.94491400  | -0.05569400 | 0.12733300  | C              | -2.36721400 | -1.78963000 | 0.02509000  |
| H              | 3.54755800  | -0.96979800 | 0.04028900  | H              | -2.41738700 | -2.88443600 | 0.10027700  |
| H              | 2.55309000  | 0.01620100  | 1.15721400  | H              | -3.25975200 | -1.43519600 | -0.51940700 |
| H              | 3.59252300  | 0.81368700  | -0.07122600 | H              | -2.38410500 | -1.36706900 | 1.04603900  |
| H              | -0.05985500 | -1.23031800 | 1.55042700  | O              | 0.95419100  | 0.81747500  | 1.63319200  |
| C              | -0.07775600 | -2.16744700 | 0.96559400  | C              | 0.56932800  | -0.42233000 | 2.26071800  |
| O              | -0.13988700 | -1.91165600 | -0.44423600 | H              | 1.58765400  | 0.58930900  | 0.91788700  |
| H              | -0.97626400 | -2.73768500 | 1.23765500  | H              | -0.20544500 | -0.17952900 | 3.00018600  |
| H              | 0.81113500  | -2.76546000 | 1.22469200  | H              | 1.42487700  | -0.87830100 | 2.78399900  |
| H              | 0.66447100  | -1.38208000 | -0.66500900 | H              | 0.16420300  | -1.13400300 | 1.52283500  |
| O              | -1.88919600 | 0.14533500  | -0.83809800 | H              | -0.83701600 | 3.35662000  | -0.53416900 |
| C              | -2.94543200 | 0.05525800  | 0.12720900  | C              | -1.44055600 | 2.44043900  | -0.63225900 |
| H              | -1.34602700 | -0.67669200 | -0.76798500 | O              | -0.62192700 | 1.26658400  | -0.50756100 |
| H              | -3.54803300 | 0.96938200  | 0.04007900  | H              | -1.89295400 | 2.41524900  | -1.63219600 |
| H              | -2.55416200 | -0.01690500 | 1.15728200  | H              | -2.24205000 | 2.45038100  | 0.12399500  |
| H              | -3.59292400 | -0.81407500 | -0.07193300 | H              | -0.19212200 | 1.25802200  | 0.38272900  |
| <b>MeOH4_7</b> |             |             |             | <b>MeOH4_7</b> |             |             |             |
| C              | -0.44580500 | 2.47961000  | -0.69157100 | C              | 0.24287200  | 2.81272200  | 0.23832800  |
| O              | -1.02737200 | 1.61614200  | 0.29464800  | O              | 0.14340300  | 1.40660100  | -0.04533300 |
| H              | -0.28791400 | 1.27884300  | 0.85483000  | H              | -0.04827300 | 0.91630200  | 0.79104700  |
| H              | -1.25821900 | 2.82531500  | -1.34480900 | H              | 0.42189600  | 3.32332700  | -0.71669300 |
| H              | 0.30157800  | 1.94786800  | -1.30636700 | H              | 1.08370200  | 3.02128200  | 0.91883900  |
| H              | 0.03190100  | 3.35598000  | -0.22372200 | H              | -0.68958400 | 3.19583300  | 0.68242400  |
| H              | -0.31268600 | -0.51794900 | 2.92957700  | H              | 1.71393800  | 0.45042100  | -0.50001300 |
| C              | 0.40721100  | -0.81411500 | 2.15483000  | O              | 2.40793300  | -0.21922100 | -0.64277100 |
| O              | 0.99708000  | 0.39854500  | 1.64575300  | C              | 1.90164600  | -1.13913000 | -1.61629400 |
| H              | 1.17340300  | -1.46168500 | 2.60955500  | H              | 2.65951600  | -1.92429600 | -1.74191900 |
| H              | -0.11817200 | -1.36517200 | 1.35800100  | H              | 1.73662200  | -0.65304600 | -2.59375800 |
| H              | 1.61067600  | 0.13410800  | 0.92996600  | H              | 0.95561400  | -1.60723300 | -1.29251900 |
| H              | 0.68795400  | -0.96828500 | -1.37698300 | O              | -1.55180800 | -0.70773000 | -0.82761700 |
| C              | 1.72692000  | -0.81390200 | -1.69315500 | C              | -2.95574200 | -0.43620200 | -0.98186300 |
| O              | 2.48794800  | -0.52699400 | -0.49495800 | H              | -1.07512900 | 0.14041800  | -0.90706800 |
| H              | 2.10108700  | -1.72761600 | -2.17979400 | H              | -3.47998200 | -1.39201100 | -0.85431300 |
| H              | 1.77535100  | 0.02752100  | -2.40214400 | H              | -3.17736700 | -0.03980300 | -1.98555500 |
| H              | 3.40687200  | -0.36118200 | -0.74124500 | H              | -3.31646800 | 0.27505700  | -0.21996700 |
| O              | -1.51414800 | -0.85363300 | -0.82127500 | H              | 1.30722200  | -1.33101100 | 1.35602100  |
| C              | -2.71098100 | -1.43226900 | -0.29653600 | C              | 0.53001600  | -1.32008100 | 2.13663800  |

|                 |             |             |             |                 |             |             |             |
|-----------------|-------------|-------------|-------------|-----------------|-------------|-------------|-------------|
| H               | -1.43970100 | 0.05331400  | -0.44916100 | O               | -0.56704600 | -0.45401900 | 1.77079200  |
| H               | -2.78027400 | -2.45660500 | -0.68858200 | H               | 0.95513800  | -0.91448900 | 3.06378800  |
| H               | -3.60949300 | -0.87388300 | -0.61114500 | H               | 0.17110900  | -2.34322600 | 2.32909500  |
| H               | -2.69450700 | -1.47898300 | 0.80726200  | H               | -0.99056300 | -0.82642900 | 0.96916100  |
| <b>MeOH4_9</b>  |             |             |             | <b>MeOH4_10</b> |             |             |             |
| C               | 0.24077600  | 2.81266300  | 0.23676200  | C               | -3.46871500 | -0.48428000 | -0.04903200 |
| O               | 0.14340100  | 1.40607200  | -0.04538600 | O               | -2.31821600 | -0.10970500 | -0.82405400 |
| H               | -0.04979100 | 0.91660600  | 0.79114400  | H               | -1.91913800 | 0.68436400  | -0.41152300 |
| H               | 0.42178100  | 3.32223200  | -0.71844100 | H               | -3.86159000 | -1.41198800 | -0.48527800 |
| H               | 1.07963700  | 3.02288100  | 0.91918500  | H               | -4.25073600 | 0.29010900  | -0.09826900 |
| H               | -0.69321100 | 3.19540400  | 0.67795400  | H               | -3.20552300 | -0.66502300 | 1.00690200  |
| H               | 1.71424800  | 0.44995400  | -0.49787000 | H               | 1.99472400  | -1.18245800 | -0.77957000 |
| O               | 2.40869700  | -0.21926200 | -0.64041600 | O               | 2.94156900  | -1.01725700 | -0.62994500 |
| C               | 1.90390000  | -1.13868800 | -1.61511100 | C               | 3.02830700  | 0.26947700  | -0.01980500 |
| H               | 2.66252200  | -1.92309700 | -1.74095700 | H               | 4.09012200  | 0.46181500  | 0.18545200  |
| H               | 1.73913200  | -0.65187100 | -2.59226900 | H               | 2.47666600  | 0.31292500  | 0.93806900  |
| H               | 0.95804500  | -1.60792400 | -1.29244200 | H               | 2.65198700  | 1.06853800  | -0.68373800 |
| O               | -1.55000400 | -0.70913200 | -0.82885200 | O               | 0.16089800  | -1.12902300 | -0.25006500 |
| C               | -2.95380100 | -0.43748200 | -0.98418000 | C               | 0.06271800  | -1.86863300 | 0.98255400  |
| H               | -1.07321300 | 0.13897200  | -0.90821200 | H               | -0.75220500 | -0.98926700 | -0.58937800 |
| H               | -3.47821800 | -1.39325700 | -0.85709100 | H               | 1.08903800  | -2.05592800 | 1.32462900  |
| H               | -3.17462200 | -0.04100300 | -1.98802000 | H               | -0.44367300 | -2.83406800 | 0.82648900  |
| H               | -3.31505900 | 0.27376600  | -0.22251700 | H               | -0.47642900 | -1.28897200 | 1.75051900  |
| H               | 1.30479300  | -1.33078500 | 1.35749200  | H               | 0.47707400  | 2.75116400  | -0.92193200 |
| C               | 0.52790200  | -1.31813800 | 2.13839500  | C               | 0.21482200  | 2.71254700  | 0.14797900  |
| O               | -0.56956400 | -0.45326100 | 1.77092100  | O               | -0.48900700 | 1.50403000  | 0.47655600  |
| H               | 0.95333300  | -0.91011800 | 3.06433900  | H               | -0.46010800 | 3.54623000  | 0.38021100  |
| H               | 0.16933800  | -2.34089200 | 2.33356100  | H               | 1.13015100  | 2.81681800  | 0.75190800  |
| H               | -0.99161700 | -0.82632900 | 0.96881500  | H               | 0.07488700  | 0.73671600  | 0.25540500  |
| <b>MeOH4_11</b> |             |             |             | <b>MeOH4_12</b> |             |             |             |
| C               | -0.26332400 | 2.42878500  | 0.65089200  | C               | -2.09878400 | -1.78092300 | -1.26461500 |
| O               | 1.05270200  | 1.89527200  | 0.80221200  | O               | -0.97490700 | -1.38957900 | -0.45849000 |
| H               | 1.16850500  | 1.21372200  | 0.10873300  | H               | -0.39461000 | -0.82600900 | -1.00123300 |
| H               | -0.39267500 | 3.19994200  | 1.42301500  | H               | -2.75162000 | -2.38817100 | -0.62437800 |
| H               | -1.04354700 | 1.65874100  | 0.79237500  | H               | -1.77798100 | -2.38946900 | -2.12477000 |
| H               | -0.40619700 | 2.90062600  | -0.33802900 | H               | -2.66296200 | -0.90555100 | -1.62778000 |
| H               | 3.06967800  | 0.15923100  | -1.92300600 | H               | -1.08387900 | -0.13915500 | 0.91933100  |
| C               | 2.62084200  | -0.60066900 | -1.26954400 | O               | -0.96448400 | 0.74772600  | 1.32151800  |
| O               | 1.25890400  | -0.21053700 | -1.03707700 | C               | -2.23416600 | 1.41609000  | 1.24336100  |
| H               | 2.67472700  | -1.58004200 | -1.77204800 | H               | -2.09810900 | 2.41828300  | 1.67035600  |
| H               | 3.19583300  | -0.64377400 | -0.32895500 | H               | -3.00199300 | 0.88358500  | 1.82720200  |
| H               | 0.83641100  | -0.89669900 | -0.46730400 | H               | -2.57655600 | 1.51497600  | 0.19865200  |
| H               | 1.11918400  | -1.81962900 | 2.27095800  | H               | 0.10686000  | 1.12048500  | -0.08168100 |
| C               | 0.17811700  | -1.33534000 | 1.97840000  | O               | 0.56728700  | 0.91112400  | -0.92601300 |
| O               | -0.14148300 | -1.81374500 | 0.65384200  | C               | 1.31812600  | 2.05953000  | -1.35940700 |
| H               | -0.60471100 | -1.62308000 | 2.69775600  | H               | 2.08408900  | 2.33495700  | -0.61711800 |
| H               | 0.31679100  | -0.24233500 | 1.98848100  | H               | 0.65525800  | 2.91973400  | -1.54443000 |
| H               | -1.01939500 | -1.45089500 | 0.41719700  | H               | 1.81535700  | 1.78274100  | -2.29788200 |
| H               | -1.04411200 | 0.29186500  | -1.54139200 | H               | 1.65750400  | -0.47469200 | 2.00009500  |
| C               | -2.12764700 | 0.12833300  | -1.50410700 | C               | 2.02317100  | -1.29182100 | 1.35393000  |

|                |             |             |             |                |             |             |             |
|----------------|-------------|-------------|-------------|----------------|-------------|-------------|-------------|
| O              | -2.40845000 | -0.46191700 | -0.21203000 | O              | 2.62751000  | -0.79268600 | 0.15401200  |
| H              | -2.65053600 | 1.09064100  | -1.61387300 | H              | 2.80027400  | -1.84683100 | 1.89659500  |
| H              | -2.41886800 | -0.55035600 | -2.32035300 | H              | 1.18541000  | -1.97586700 | 1.13499100  |
| H              | -3.34238800 | -0.70720800 | -0.18297700 | H              | 1.94962200  | -0.25894400 | -0.29578800 |
| <b>MeOH5_1</b> |             |             |             | <b>MeOH5_2</b> |             |             |             |
| C              | 0.18199800  | 2.97837900  | 0.40436800  | C              | 0.77739800  | -0.97410200 | 2.18994000  |
| O              | 0.35488100  | 1.86014900  | -0.48116500 | O              | 0.93247200  | -1.77051700 | 1.00237900  |
| H              | -0.53003900 | 1.42600100  | -0.57592100 | H              | 0.01654100  | -1.95897300 | 0.67343100  |
| H              | 1.17368700  | 3.41958200  | 0.57426300  | H              | 1.76900600  | -0.58187400 | 2.45635800  |
| H              | -0.24208200 | 2.66422200  | 1.37270900  | H              | 0.40348400  | -1.58636200 | 3.02577300  |
| H              | -0.47504900 | 3.73921100  | -0.04582300 | H              | 0.08302000  | -0.13311000 | 2.02427000  |
| H              | 1.50592000  | 0.76030500  | 0.08128700  | H              | 1.54742800  | -0.84313600 | -0.26373200 |
| O              | 2.15697500  | 0.07973900  | 0.39174000  | O              | 1.80359600  | -0.22151400 | -0.99476800 |
| C              | 3.33340700  | 0.20680200  | -0.42149400 | C              | 3.23208000  | -0.09336800 | -0.99622900 |
| H              | 4.01462000  | -0.60918200 | -0.14429400 | H              | 3.49935300  | 0.59963900  | -1.80566800 |
| H              | 3.83899000  | 1.16899200  | -0.23961900 | H              | 3.71519500  | -1.06506800 | -1.18603400 |
| H              | 3.09352600  | 0.12618800  | -1.49535600 | H              | 3.60591500  | 0.31271200  | -0.04024300 |
| H              | -0.05228500 | 0.01039300  | 2.15335400  | H              | -3.05634000 | 1.27664200  | -1.27600200 |
| C              | -0.93233700 | -0.60097700 | 2.41656200  | C              | -3.12506500 | 1.33928200  | -0.17685600 |
| O              | -1.45403700 | -1.29288500 | 1.26719400  | O              | -1.97208200 | 0.76462000  | 0.45686700  |
| H              | -1.72947600 | 0.05367900  | 2.79419300  | H              | -4.00206700 | 0.77025400  | 0.16038200  |
| H              | -0.64916800 | -1.31338800 | 3.20729100  | H              | -3.25266500 | 2.39443300  | 0.11429200  |
| H              | -0.68437600 | -1.74567700 | 0.84022000  | H              | -1.17005000 | 1.22512100  | 0.10159500  |
| O              | -2.03394400 | 0.65954400  | -0.45688500 | O              | -1.56038000 | -1.86938400 | -0.01015200 |
| C              | -2.84687300 | 0.22978200  | -1.55622300 | C              | -1.41053000 | -1.93895900 | -1.43990400 |
| H              | -1.90384300 | -0.10785300 | 0.15987300  | H              | -1.78757000 | -0.93013600 | 0.20033400  |
| H              | -2.94224700 | 1.07824000  | -2.24727100 | H              | -1.15401800 | -2.97686400 | -1.69077800 |
| H              | -3.85140500 | -0.06449700 | -1.21238200 | H              | -0.60500900 | -1.27450200 | -1.79650800 |
| H              | -2.38874100 | -0.61781300 | -2.09380700 | H              | -2.35270500 | -1.67566100 | -1.94767900 |
| H              | -0.32011800 | -2.79319800 | -1.66930500 | H              | 0.30676500  | 3.46320900  | 0.83945600  |
| C              | 0.45993500  | -2.05829500 | -1.42738600 | C              | 0.98090400  | 2.67969600  | 0.46784600  |
| O              | 0.74746300  | -2.17907400 | -0.02518900 | O              | 0.25794400  | 1.91367900  | -0.50702800 |
| H              | 1.35255100  | -2.27896700 | -2.03545200 | H              | 1.86560900  | 3.15872700  | 0.01738800  |
| H              | 0.09493500  | -1.04733600 | -1.67918100 | H              | 1.30261700  | 2.05439300  | 1.31812300  |
| H              | 1.34712100  | -1.42282800 | 0.19470000  | H              | 0.84438000  | 1.16018400  | -0.77192000 |
| <b>MeOH5_3</b> |             |             |             | <b>MeOH5_4</b> |             |             |             |
| C              | 0.27638500  | -1.74652600 | 1.36556400  | C              | -1.16331300 | -2.68242300 | 0.82453700  |
| O              | 0.28767300  | -2.07244600 | -0.03292800 | O              | -1.07355800 | -1.77956800 | -0.28942300 |
| H              | -0.60353900 | -1.80993300 | -0.37687400 | H              | -1.54878500 | -0.94493600 | -0.04318200 |
| H              | 1.30268000  | -1.86111100 | 1.74191200  | H              | -0.46361800 | -3.50852800 | 0.63834200  |
| H              | -0.37978900 | -2.43203700 | 1.92635400  | H              | -2.18168000 | -3.09304200 | 0.91397400  |
| H              | -0.05848400 | -0.70902200 | 1.53668000  | H              | -0.89071100 | -2.18397900 | 1.76840100  |
| H              | 1.44637700  | -1.07823600 | -0.79381900 | H              | 0.42155600  | -1.19415700 | -0.75925200 |
| O              | 2.10105400  | -0.40637500 | -1.11286500 | O              | 1.24547500  | -0.70074300 | -1.01861300 |
| C              | 3.41277000  | -0.86688000 | -0.76307300 | C              | 1.77093100  | -1.28929500 | -2.22082700 |
| H              | 4.13390600  | -0.13981700 | -1.16068100 | H              | 2.66417100  | -0.71643100 | -2.50263100 |
| H              | 3.61853000  | -1.85191100 | -1.21143000 | H              | 1.03553300  | -1.23905300 | -3.03951900 |
| H              | 3.54411100  | -0.93672100 | 0.33124700  | H              | 2.05776700  | -2.33940100 | -2.05286500 |
| H              | -1.78190200 | 2.47052700  | -1.70653200 | H              | 1.54672700  | 3.26701600  | -0.94647500 |
| C              | -2.14584900 | 2.48930600  | -0.66604700 | C              | 0.88658100  | 2.80732900  | -0.19365400 |



|                |             |             |             |                |             |             |             |
|----------------|-------------|-------------|-------------|----------------|-------------|-------------|-------------|
| O              | -1.55973600 | 1.43591800  | 0.11582200  | O              | 0.06130500  | 1.79085100  | -0.79792700 |
| H              | -3.23327100 | 2.33299600  | -0.66440300 | H              | 0.20965700  | 3.57738000  | 0.20018700  |
| H              | -1.92758000 | 3.47504700  | -0.22530300 | H              | 1.49576300  | 2.39031900  | 0.62199100  |
| H              | -0.57858600 | 1.57208300  | 0.10593700  | H              | 0.61487800  | 0.99851500  | -0.97086700 |
| O              | -2.12676000 | -1.07246600 | -0.67001200 | O              | -2.06457400 | 0.62647200  | 0.36432700  |
| C              | -3.16482500 | -1.53888700 | 0.20417100  | C              | -3.26247500 | 1.08415700  | -0.28390200 |
| H              | -1.94982300 | -0.12626800 | -0.43635000 | H              | -1.30873300 | 1.15282700  | 0.00153400  |
| H              | -3.25857500 | -2.62348000 | 0.05575400  | H              | -4.08848200 | 0.45365000  | 0.07169500  |
| H              | -4.12970500 | -1.06393000 | -0.03735000 | H              | -3.18759300 | 0.99544700  | -1.38031200 |
| H              | -2.92362700 | -1.33935800 | 1.26217000  | H              | -3.47725000 | 2.13204100  | -0.02023200 |
| H              | 1.26618600  | 2.71178500  | 1.86604200  | H              | 1.16626000  | -1.06908200 | 2.50855700  |
| C              | 1.78508800  | 1.93626100  | 1.28648800  | C              | 1.29859600  | -0.00275300 | 2.25373200  |
| O              | 1.09940900  | 1.80091200  | 0.03458200  | O              | 2.41956900  | 0.20056400  | 1.38910400  |
| H              | 2.83090700  | 2.24920000  | 1.13304000  | H              | 1.49989200  | 0.55087200  | 3.18111400  |
| H              | 1.77220300  | 0.99471300  | 1.86171800  | H              | 0.35899600  | 0.37817800  | 1.81480300  |
| H              | 1.51544300  | 1.04150100  | -0.44752700 | H              | 2.18799500  | -0.21033200 | 0.53568600  |
| <b>MeOH5_5</b> |             |             |             | <b>MeOH5_6</b> |             |             |             |
| C              | -1.26408500 | -0.05747600 | 2.65761100  | C              | 0.43538700  | 2.60719900  | -0.71937200 |
| O              | -0.82144100 | 0.11858700  | 1.30141300  | O              | 1.02570500  | 1.84559200  | 0.34816300  |
| H              | -0.36159200 | -0.71443500 | 0.99750300  | H              | 0.30207100  | 1.33497600  | 0.77944200  |
| H              | -1.78741900 | 0.86114300  | 2.95406300  | H              | 1.23782800  | 3.20145100  | -1.17576700 |
| H              | -0.41062900 | -0.22004600 | 3.33479800  | H              | -0.33904400 | 3.29011900  | -0.33591200 |
| H              | -1.95845200 | -0.90887400 | 2.73897200  | H              | -0.00658500 | 1.95130400  | -1.48757200 |
| H              | 0.37899400  | 1.36419600  | 0.74848100  | H              | 2.02005700  | 0.56581900  | -0.26782400 |
| O              | 1.09023600  | 1.83932200  | 0.26778400  | O              | 2.43196400  | -0.26718200 | -0.60528300 |
| C              | 0.46324700  | 2.65835900  | -0.74235800 | C              | 3.78531400  | -0.32681600 | -0.12944600 |
| H              | 1.26992900  | 3.07120000  | -1.36212900 | H              | 4.21778800  | -1.26806200 | -0.49389600 |
| H              | -0.09135100 | 3.48932300  | -0.27883700 | H              | 3.82924000  | -0.31494700 | 0.97232500  |
| H              | -0.22235200 | 2.06890300  | -1.37001700 | H              | 4.37962000  | 0.51307000  | -0.52317300 |
| H              | 3.73725500  | -0.30265300 | 0.98851400  | H              | 0.12700700  | -3.37621800 | -1.21783600 |
| C              | 3.74270000  | -0.38183100 | -0.11154300 | C              | -0.23158200 | -2.36495300 | -0.97128500 |
| O              | 2.41413400  | -0.32454800 | -0.65231900 | O              | 0.43449200  | -1.87115600 | 0.20942900  |
| H              | 4.17084400  | -1.35187300 | -0.39773300 | H              | -1.30960100 | -2.39675700 | -0.76355200 |
| H              | 4.37258000  | 0.42096000  | -0.52688900 | H              | -0.05046500 | -1.69944500 | -1.83026200 |
| H              | 2.00416800  | 0.52973400  | -0.36633000 | H              | 1.26370900  | -1.41880100 | -0.08263200 |
| O              | 0.46305600  | -1.93728000 | 0.24835300  | O              | -0.88851200 | 0.13134400  | 1.29042100  |
| C              | -0.28041000 | -2.36700200 | -0.91012000 | C              | -1.20023000 | -0.07446700 | 2.68203800  |
| H              | 1.25268300  | -1.43788100 | -0.08398300 | H              | -0.41145600 | -0.67862200 | 0.94945600  |
| H              | -1.11716100 | -2.98017400 | -0.54855400 | H              | -1.70751000 | 0.83038100  | 3.04134900  |
| H              | 0.35073200  | -2.98266500 | -1.56927000 | H              | -0.28453300 | -0.23459900 | 3.27273400  |
| H              | -0.67465600 | -1.50629400 | -1.47487100 | H              | -1.87231100 | -0.93767900 | 2.80831300  |
| H              | -4.20126400 | 0.19180000  | -0.35045800 | H              | -1.82679700 | 0.16275000  | -2.05321200 |
| C              | -3.45656300 | -0.13217100 | -1.09872300 | C              | -2.79307200 | 0.47874600  | -1.61893200 |
| O              | -2.26361200 | 0.65244000  | -1.03903100 | O              | -3.10360600 | -0.24157500 | -0.42636000 |
| H              | -3.88713500 | 0.00505500  | -2.09993600 | H              | -3.58595400 | 0.26073200  | -2.34727800 |
| H              | -3.25073800 | -1.20759800 | -0.95107200 | H              | -2.76505400 | 1.56979800  | -1.44892200 |
| H              | -1.86274600 | 0.50273100  | -0.16105500 | H              | -2.39325400 | -0.04970400 | 0.21523800  |
| <b>MeOH5_7</b> |             |             |             | <b>MeOH5_8</b> |             |             |             |
| C              | 0.33683200  | 3.09616200  | -0.35536200 | C              | -0.74942100 | 2.48020100  | -1.04856300 |
| O              | 0.22760600  | 1.68896000  | -0.08231700 | O              | 0.05239100  | 1.34424900  | -0.68023900 |

|                |             |             |             |                 |             |             |             |
|----------------|-------------|-------------|-------------|-----------------|-------------|-------------|-------------|
| H              | -0.64740500 | 1.36148000  | -0.44046700 | H               | -0.47145600 | 0.52880200  | -0.83384600 |
| H              | 1.31268800  | 3.43071700  | 0.02099900  | H               | -0.21408700 | 3.37697100  | -0.70929800 |
| H              | -0.45690200 | 3.65992700  | 0.15982500  | H               | -1.73377100 | 2.43038900  | -0.55873400 |
| H              | 0.27966500  | 3.29403300  | -1.43755100 | H               | -0.88427300 | 2.53706900  | -2.14128700 |
| H              | 0.10678000  | 0.73979700  | 1.52279500  | H               | 1.72571600  | 0.83639400  | -0.81331900 |
| O              | -0.05246500 | 0.05560400  | 2.20042600  | O               | 2.55374700  | 0.31726400  | -0.69430200 |
| C              | 1.19012700  | -0.61692000 | 2.42672700  | C               | 3.35721800  | 1.01017500  | 0.27337500  |
| H              | 1.01148300  | -1.37417700 | 3.20250300  | H               | 4.21734600  | 0.36729100  | 0.50464500  |
| H              | 1.97070600  | 0.07418200  | 2.79011400  | H               | 2.79342400  | 1.20658800  | 1.20109800  |
| H              | 1.55274900  | -1.12242800 | 1.51471400  | H               | 3.72862300  | 1.96564400  | -0.13085200 |
| O              | 1.61877500  | -0.42083100 | -1.13174900 | H               | 0.65442900  | -0.47650700 | 1.77495100  |
| C              | 3.04571800  | -0.44515100 | -1.02015400 | C               | 1.10342600  | -1.48053000 | 1.68994800  |
| H              | 1.27831100  | 0.42991700  | -0.77824300 | O               | 1.27562000  | -1.86191800 | 0.31217500  |
| H              | 3.38465400  | -1.42409400 | -1.38406900 | H               | 0.43004900  | -2.21553600 | 2.15034200  |
| H              | 3.37146700  | -0.32257100 | 0.02664100  | H               | 2.06598300  | -1.49634800 | 2.22555100  |
| H              | 3.50999500  | 0.34132600  | -1.63766400 | H               | 1.84649500  | -1.16602600 | -0.09797000 |
| H              | -2.37496100 | 0.03873000  | 1.06638200  | O               | -1.06271200 | -1.17027200 | -0.74833900 |
| C              | -2.90875000 | 0.38518000  | 0.16678100  | C               | -1.52155900 | -1.96232300 | -1.85764900 |
| O              | -2.00317200 | 0.57532400  | -0.94006200 | H               | -0.21466400 | -1.55684400 | -0.40092600 |
| H              | -3.37590900 | 1.35750000  | 0.37272600  | H               | -2.45294800 | -1.50698200 | -2.21943600 |
| H              | -3.69863100 | -0.33492100 | -0.09911200 | H               | -1.72722000 | -2.99710600 | -1.54255100 |
| H              | -1.62611600 | -0.31300100 | -1.16338700 | H               | -0.78090400 | -1.96895900 | -2.67325200 |
| H              | -0.19339000 | -3.41506300 | -0.05849000 | H               | -2.06486200 | -0.02560400 | 2.62200200  |
| C              | -0.88598400 | -2.55828400 | -0.07322500 | C               | -2.20412300 | 0.81912700  | 1.92439700  |
| O              | -0.74328500 | -1.80602000 | -1.29492800 | O               | -2.87626600 | 0.41672100  | 0.72802500  |
| H              | -1.91543200 | -2.94065500 | -0.05232600 | H               | -2.83898900 | 1.57045600  | 2.41364600  |
| H              | -0.71415500 | -1.92441800 | 0.81150300  | H               | -1.22053600 | 1.27255400  | 1.70811900  |
| H              | 0.17707100  | -1.46650000 | -1.31646200 | H               | -2.31383700 | -0.25049400 | 0.29350500  |
| <b>MeOH5_9</b> |             |             |             | <b>MeOH5_10</b> |             |             |             |
| C              | 2.52486800  | 2.41671600  | -0.64273600 | C               | 1.67755300  | -0.85367200 | 2.39797800  |
| O              | 2.09719200  | 1.37712500  | 0.25326700  | O               | 1.06468500  | -0.29566800 | 1.21795700  |
| H              | 1.12167600  | 1.47531800  | 0.37588500  | H               | 0.51865700  | -1.00516900 | 0.77645800  |
| H              | 3.59920400  | 2.27352200  | -0.82001800 | H               | 2.25633400  | -0.05198100 | 2.87465600  |
| H              | 2.36856000  | 3.41118600  | -0.19550900 | H               | 2.35660600  | -1.67834300 | 2.13126800  |
| H              | 1.99035500  | 2.36410100  | -1.60555900 | H               | 0.91461600  | -1.21877200 | 3.10304700  |
| H              | 2.18783400  | -0.19706900 | -0.42090700 | H               | -0.18006400 | 0.96586700  | 1.30560700  |
| O              | 2.07087000  | -1.11456100 | -0.77617400 | O               | -0.95440300 | 1.55147400  | 1.14021600  |
| C              | 3.00262900  | -1.97483900 | -0.10306200 | C               | -0.61112600 | 2.38750900  | 0.02368600  |
| H              | 2.81374100  | -2.99917400 | -0.45201200 | H               | -1.47808600 | 3.02990100  | -0.18062900 |
| H              | 2.87310400  | -1.93724000 | 0.99192300  | H               | -0.38527400 | 1.79099100  | -0.87701500 |
| H              | 4.04110600  | -1.70283100 | -0.35050500 | H               | 0.25624300  | 3.02559400  | 0.25576000  |
| H              | 0.20560400  | -1.32422600 | 1.84942100  | H               | -2.90893700 | 0.54282700  | -1.55003800 |
| C              | -0.46699800 | -1.91795400 | 1.20706900  | C               | -3.49944300 | 0.07441700  | -0.74348600 |
| O              | -0.51249000 | -1.38286400 | -0.12959400 | O               | -2.66136500 | -0.41442000 | 0.31312000  |
| H              | -1.48703900 | -1.86962100 | 1.61144300  | H               | -4.04252700 | -0.78651900 | -1.15557100 |
| H              | -0.13206400 | -2.96705300 | 1.20032000  | H               | -4.23174300 | 0.80497800  | -0.36333400 |
| H              | 0.41895000  | -1.38144000 | -0.47309400 | H               | -2.15264200 | 0.35031100  | 0.67493000  |
| O              | -0.60294500 | 1.33889200  | 0.33511300  | O               | -0.47684400 | -1.94367000 | -0.15889400 |
| C              | -1.47069300 | 1.63756500  | 1.44467800  | C               | -0.12691800 | -1.69086400 | -1.53330500 |
| H              | -0.69593300 | 0.38110800  | 0.13164600  | H               | -1.36258500 | -1.53215600 | -0.00949300 |
| H              | -1.50891800 | 2.73073400  | 1.54019200  | H               | 0.94044200  | -1.91687600 | -1.65207800 |
| H              | -1.08145600 | 1.21009400  | 2.38434700  | H               | -0.29696800 | -0.63355700 | -1.80016500 |

|                 |             |             |             |                 |             |             |             |
|-----------------|-------------|-------------|-------------|-----------------|-------------|-------------|-------------|
| H               | -2.48201600 | 1.24629400  | 1.25918900  | H               | -0.71581600 | -2.33082400 | -2.20902700 |
| H               | -3.57159300 | -0.15964600 | -2.34025400 | H               | 2.68168400  | 2.00824800  | -1.04932600 |
| C               | -3.51908200 | 0.28017200  | -1.32971400 | C               | 2.67485800  | 1.07498600  | -1.63986500 |
| O               | -3.23605600 | -0.71029000 | -0.33367100 | O               | 2.98515600  | -0.06691900 | -0.84264800 |
| H               | -4.50075600 | 0.70822800  | -1.08522200 | H               | 3.44768300  | 1.15027300  | -2.41689400 |
| H               | -2.76648600 | 1.08774800  | -1.32794200 | H               | 1.69253200  | 0.97811400  | -2.13817600 |
| H               | -2.35078000 | -1.06641500 | -0.52228600 | H               | 2.34246600  | -0.09354600 | -0.10804000 |
| <b>MeOH5_11</b> |             |             |             | <b>MeOH5_12</b> |             |             |             |
| C               | 0.98750700  | 0.11018800  | 2.59302800  | C               | -0.55985700 | -1.64034700 | -1.87798500 |
| O               | 0.03786200  | -0.56421000 | 1.75294900  | O               | 0.33472000  | -0.79702500 | -1.12481600 |
| H               | 0.55506700  | -0.96683100 | 1.01131800  | H               | 0.32202700  | -1.09063500 | -0.17862300 |
| H               | 0.43186600  | 0.54447300  | 3.43478300  | H               | -0.59186100 | -1.24544600 | -2.90194900 |
| H               | 1.50626100  | 0.92076200  | 2.05161400  | H               | -1.56808400 | -1.61657500 | -1.43733200 |
| H               | 1.73613600  | -0.59405900 | 2.98997800  | H               | -0.19044900 | -2.67740100 | -1.90253300 |
| H               | -0.86243400 | 0.53079500  | 0.81201000  | H               | -0.40645300 | 0.81245000  | -0.88800400 |
| O               | -1.25866700 | 1.10928400  | 0.10981100  | O               | -0.92833600 | 1.58634200  | -0.58237200 |
| C               | -2.31600700 | 1.89467900  | 0.68944800  | C               | -0.01073800 | 2.62672300  | -0.21488900 |
| H               | -2.72544500 | 2.52855000  | -0.10779200 | H               | -0.58837100 | 3.39995600  | 0.30924100  |
| H               | -1.93446000 | 2.53679700  | 1.49946400  | H               | 0.45727500  | 3.07659600  | -1.10614700 |
| H               | -3.11700100 | 1.24603200  | 1.07758700  | H               | 0.78460500  | 2.25290900  | 0.45060200  |
| H               | 1.90413500  | 2.07345900  | -0.14264600 | O               | 2.68588500  | 0.24445100  | -0.03778900 |
| C               | 1.75515300  | 2.08240100  | -1.23646000 | C               | 4.05128400  | -0.04239300 | -0.38182500 |
| O               | 0.83515400  | 1.06154200  | -1.65315600 | H               | 2.11098900  | -0.09867400 | -0.74711800 |
| H               | 2.71424800  | 1.87749000  | -1.73088700 | H               | 4.67314900  | 0.35040800  | 0.43281600  |
| H               | 1.40601300  | 3.08153300  | -1.54173500 | H               | 4.33949000  | 0.45636900  | -1.32096500 |
| H               | -0.00232000 | 1.21701200  | -1.16560600 | H               | 4.22649900  | -1.12677800 | -0.47558900 |
| O               | 1.48997500  | -1.27967800 | -0.41540900 | H               | -0.09896300 | 0.61332500  | 2.05383400  |
| C               | 2.91834900  | -1.36957300 | -0.30872500 | C               | 0.03076300  | -0.42284800 | 2.40518300  |
| H               | 1.28030300  | -0.49410500 | -0.97648500 | O               | 0.82673500  | -1.19253600 | 1.47934100  |
| H               | 3.14549200  | -2.24969100 | 0.30761300  | H               | -0.95430000 | -0.90042700 | 2.45454400  |
| H               | 3.34926600  | -0.47468100 | 0.17346800  | H               | 0.49560500  | -0.41741700 | 3.40355300  |
| H               | 3.38119100  | -1.50260000 | -1.29970500 | H               | 1.64406100  | -0.69143700 | 1.28802100  |
| H               | -0.98886600 | -2.25340900 | -0.96950500 | H               | -3.68360100 | -0.08649600 | -1.23818800 |
| C               | -2.02818600 | -2.17943600 | -0.60575600 | C               | -3.86703600 | -0.15566600 | -0.15117100 |
| O               | -2.71173700 | -1.04750200 | -1.15923000 | O               | -2.64749500 | -0.26200500 | 0.58788400  |
| H               | -2.57823800 | -3.07336300 | -0.92930000 | H               | -4.45096900 | -1.06458700 | 0.05072600  |
| H               | -2.01745800 | -2.15322300 | 0.49808400  | H               | -4.46199600 | 0.72027500  | 0.16040000  |
| H               | -2.22533600 | -0.25998000 | -0.86119700 | H               | -2.09723100 | 0.50694900  | 0.33885100  |
| <b>MeOH5_13</b> |             |             |             | <b>MeOH5_14</b> |             |             |             |
| C               | 0.40325700  | -2.43357800 | -0.79437400 | C               | -0.33969000 | -0.35712400 | 2.34039500  |
| O               | 1.22821700  | -1.73819900 | 0.14533500  | O               | 0.40715800  | -1.22831800 | 1.47281900  |
| H               | 0.64140400  | -1.17340300 | 0.70685600  | H               | 1.28782400  | -0.81350700 | 1.30942300  |
| H               | 1.06108900  | -3.06914700 | -1.40220500 | H               | -1.39755100 | -0.64230500 | 2.26530500  |
| H               | -0.12813400 | -1.73736200 | -1.46746900 | H               | -0.23433200 | 0.69804900  | 2.03524700  |
| H               | -0.33291600 | -3.07779900 | -0.28419200 | H               | -0.00396400 | -0.46255000 | 3.38412300  |
| H               | 1.34642200  | 0.09579100  | 2.96290600  | H               | 3.15925400  | -1.94533600 | -0.18907900 |
| C               | 0.84797700  | 0.78422300  | 2.26685100  | C               | 2.94699000  | -0.93559600 | -0.56488100 |
| O               | -0.19311100 | 0.03949100  | 1.60421400  | O               | 2.70400700  | -0.10157400 | 0.58543500  |
| H               | 0.42401400  | 1.62535600  | 2.83809700  | H               | 3.81760600  | -0.57513600 | -1.13462000 |
| H               | 1.58314300  | 1.16677000  | 1.54030700  | H               | 2.06513200  | -0.96972800 | -1.22591600 |

|                |             |             |             |                |             |             |             |
|----------------|-------------|-------------|-------------|----------------|-------------|-------------|-------------|
| H              | -0.58104300 | 0.64009000  | 0.92058600  | H              | 2.46005800  | 0.78306500  | 0.24197800  |
| H              | 0.51031200  | 1.51884400  | -1.39397100 | H              | 0.03675700  | 1.18655300  | -0.88887300 |
| C              | -0.56975700 | 1.49611300  | -1.58647600 | C              | 0.34338300  | 2.22608900  | -0.72062200 |
| O              | -1.24061900 | 1.61853000  | -0.31382800 | O              | 1.78691400  | 2.21719700  | -0.60979500 |
| H              | -0.84805100 | 2.32890800  | -2.25105100 | H              | 0.02304500  | 2.83997500  | -1.57632400 |
| H              | -0.82778000 | 0.54440200  | -2.07999100 | H              | -0.12232600 | 2.60657300  | 0.20137200  |
| H              | -2.16923000 | 1.33461400  | -0.43184000 | H              | 2.08962000  | 3.12133900  | -0.45374700 |
| H              | -2.37465100 | -1.31044200 | -0.35334900 | O              | -0.71399300 | -1.01318200 | -0.94732300 |
| C              | -3.20157200 | -0.92586500 | 0.25544800  | C              | -0.93100800 | -2.28171400 | -1.58476300 |
| O              | -3.66224300 | 0.27681500  | -0.40657900 | H              | -0.29150800 | -1.18382500 | -0.06695700 |
| H              | -4.00113800 | -1.68099400 | 0.29316900  | H              | -1.36631400 | -2.08097000 | -2.57287800 |
| H              | -2.82906700 | -0.71341400 | 1.26878100  | H              | -1.63020100 | -2.90928900 | -1.00745600 |
| H              | -4.42040400 | 0.61914400  | 0.08600300  | H              | 0.01790900  | -2.82773500 | -1.71704100 |
| O              | 2.56977500  | 0.47866700  | -0.83936800 | O              | -3.16419100 | -0.07564600 | 0.00720300  |
| C              | 3.91190000  | 0.47511700  | -0.34901300 | C              | -3.09668400 | 1.34514400  | 0.08740200  |
| H              | 2.15516700  | -0.36394800 | -0.55456400 | H              | -2.31296100 | -0.38887200 | -0.36280400 |
| H              | 4.36517200  | 1.43690800  | -0.62697100 | H              | -4.09674500 | 1.70772900  | 0.36306700  |
| H              | 4.51136400  | -0.33769400 | -0.79472100 | H              | -2.81566700 | 1.80369300  | -0.87819800 |
| H              | 3.94734400  | 0.37487600  | 0.75081300  | H              | -2.38273700 | 1.68367300  | 0.86148900  |
| <b>MeOH6_1</b> |             |             |             | <b>MeOH6_2</b> |             |             |             |
| C              | -1.61904000 | 2.94601800  | -1.38019800 | H              | 2.44282400  | 0.03048700  | 0.55463400  |
| O              | -1.34700000 | 2.28049500  | -0.13847600 | O              | 2.87629400  | -0.78136100 | 0.18360200  |
| H              | -0.36224900 | 2.25530200  | -0.02173800 | C              | 3.82483000  | -0.35050800 | -0.80273400 |
| H              | -2.70730700 | 2.93058600  | -1.53003400 | H              | 3.34934200  | 0.27599400  | -1.57725300 |
| H              | -1.13388100 | 2.43509100  | -2.22866000 | H              | 4.23962400  | -1.25085100 | -1.27656700 |
| H              | -1.27718700 | 3.99293000  | -1.34911700 | H              | 4.64693400  | 0.21761800  | -0.33860900 |
| H              | -2.13544700 | 0.81371900  | 0.02097700  | H              | -1.19320500 | 1.55585200  | -0.38714600 |
| O              | -2.65007800 | -0.02621500 | 0.13770200  | O              | -0.38062700 | 2.07482400  | -0.62023300 |
| C              | -3.36083200 | 0.07052700  | 1.38039400  | C              | -0.69308100 | 3.46734500  | -0.45523200 |
| H              | -3.89262100 | -0.87913900 | 1.52985300  | H              | 0.23565500  | 4.03272900  | -0.61054600 |
| H              | -4.09555500 | 0.89099700  | 1.35107200  | H              | -1.07635100 | 3.67832300  | 0.55715300  |
| H              | -2.67454800 | 0.23345600  | 2.22820900  | H              | -1.43866600 | 3.79573900  | -1.19749900 |
| H              | 2.67641900  | -0.23588900 | -2.22902800 | H              | -2.08997200 | -0.21683900 | 0.44486400  |
| C              | 3.36160700  | -0.07155500 | -1.38060000 | O              | -2.50888200 | 0.59796500  | 0.06436900  |
| O              | 2.64935300  | 0.02617400  | -0.13886700 | C              | -3.29427200 | 0.17946500  | -1.06160600 |
| H              | 3.89298400  | 0.87826900  | -1.53054400 | H              | -4.08947000 | -0.51807700 | -0.75208600 |
| H              | 4.09681300  | -0.89153200 | -1.34948100 | H              | -2.67173400 | -0.30219200 | -1.83472100 |
| H              | 2.13486100  | -0.81384500 | -0.02184400 | H              | -3.76145000 | 1.07649200  | -1.49027600 |
| O              | 1.30210600  | 2.30708000  | 0.13800800  | H              | -0.50148100 | -1.78293700 | 0.32716200  |
| C              | 1.74138500  | 2.87352300  | 1.38097100  | O              | -1.25067200 | -1.58320300 | 0.95022800  |
| H              | 1.77256100  | 1.44168900  | 0.02056700  | C              | -1.95821600 | -2.80483000 | 1.20539400  |
| H              | 1.18517600  | 3.80903600  | 1.53081900  | H              | -2.81844300 | -2.55998900 | 1.84353300  |
| H              | 2.81937800  | 3.09919400  | 1.35182600  | H              | -1.31720500 | -3.52806000 | 1.73417600  |
| H              | 1.53904900  | 2.19742000  | 2.22848300  | H              | -2.32281700 | -3.26504800 | 0.27139000  |
| H              | 2.70669000  | -2.92857000 | 1.53170300  | H              | 0.87800800  | 1.61944100  | 0.45134000  |
| C              | 1.61843900  | -2.94374600 | 1.38173200  | O              | 1.55901300  | 1.35251400  | 1.11665800  |
| O              | 1.34691000  | -2.28045300 | 0.13871500  | C              | 0.84940900  | 1.01021800  | 2.32321300  |
| H              | 1.27607400  | -3.99054600 | 1.35260000  | H              | 0.32251300  | 1.88971400  | 2.72777400  |
| H              | 1.13341700  | -2.43097100 | 2.22916300  | H              | 1.59747300  | 0.67956800  | 3.05607900  |
| H              | 0.36219700  | -2.25530300 | 0.02158000  | H              | 0.12648900  | 0.19622600  | 2.15101800  |
| H              | -1.18204200 | -3.80889800 | -1.53098100 | H              | 1.54760100  | -1.64392400 | -0.41887300 |
| C              | -1.74103100 | -2.87508900 | -1.38082500 | O              | 0.70558700  | -2.00230200 | -0.80304800 |

|                |             |             |             |                |             |             |             |
|----------------|-------------|-------------|-------------|----------------|-------------|-------------|-------------|
| O              | -1.30187000 | -2.30665000 | -0.13873200 | C              | 0.41950000  | -1.20453300 | -1.96559300 |
| H              | -1.54198100 | -2.19874200 | -2.22890800 | H              | 0.30137300  | -0.13767600 | -1.71184100 |
| H              | -2.81826000 | -3.10419800 | -1.35012100 | H              | -0.51816600 | -1.58082500 | -2.39776600 |
| H              | -1.77308100 | -1.44157900 | -0.02204200 | H              | 1.21638600  | -1.31219600 | -2.71919100 |
| <b>MeOH6_3</b> |             |             |             | <b>MeOH6_4</b> |             |             |             |
| H              | 1.98705600  | -0.98328900 | 0.84432600  | O              | 0.88067500  | -2.18676800 | -0.91229400 |
| O              | 1.43652700  | -1.69385800 | 1.25781700  | H              | 1.61985100  | -1.70914400 | -0.46017300 |
| C              | 0.60702500  | -1.05213900 | 2.24291900  | O              | -1.17358600 | 1.78501900  | -0.43357300 |
| H              | -0.01025100 | -0.25199100 | 1.80223600  | H              | -1.75527100 | 0.98333200  | -0.35722900 |
| H              | 1.21825200  | -0.62655500 | 3.05516100  | O              | 1.34411500  | 1.71332500  | 0.44347200  |
| H              | -0.05034400 | -1.82323200 | 2.66767500  | H              | 0.41127400  | 1.70886100  | 0.10882700  |
| H              | 0.45056700  | -2.09879400 | -0.06567800 | O              | -2.68102900 | -0.40739100 | -0.29276500 |
| O              | -0.14300100 | -2.16271300 | -0.85789800 | H              | -2.11957000 | -1.10263800 | 0.14226400  |
| C              | 0.68054900  | -1.99142600 | -2.02370300 | O              | -1.03742400 | -2.09038000 | 0.96971800  |
| H              | 1.24823000  | -2.91135800 | -2.23646800 | H              | -0.34655900 | -2.28432600 | 0.28589800  |
| H              | 1.38584000  | -1.15460100 | -1.89553400 | O              | 2.70240400  | -0.60025500 | 0.28653100  |
| H              | 0.01486200  | -1.78152000 | -2.87247900 | H              | 2.19918300  | 0.24720500  | 0.37407400  |
| H              | -0.14183100 | 1.84215700  | 0.02880800  | C              | 1.34292400  | 2.36547900  | 1.72188900  |
| O              | 0.62468600  | 1.93205700  | -0.59204200 | H              | 0.70940500  | 1.83031300  | 2.44971900  |
| C              | 0.10779200  | 1.70311800  | -1.91385000 | H              | 2.37810500  | 2.37064800  | 2.08933200  |
| H              | 0.96441500  | 1.53617600  | -2.58111900 | H              | 0.98826100  | 3.40455200  | 1.63401000  |
| H              | -0.45432000 | 2.58100300  | -2.27195700 | C              | -1.31220300 | 2.29958900  | -1.76658200 |
| H              | -0.54885000 | 0.81814600  | -1.94099700 | H              | -0.55352100 | 3.08334500  | -1.89810600 |
| H              | -1.89053900 | 0.68082100  | 0.45240800  | H              | -1.14982200 | 1.51211500  | -2.52133500 |
| O              | -1.58969800 | 1.52944100  | 0.87235900  | H              | -2.31071900 | 2.74034400  | -1.91757600 |
| C              | -2.57786500 | 2.52689300  | 0.56895400  | C              | -3.89285400 | -0.29454000 | 0.46947000  |
| H              | -2.18127200 | 3.49613200  | 0.90052700  | H              | -3.69290300 | 0.03711300  | 1.50273400  |
| H              | -3.51984300 | 2.32600700  | 1.10471100  | H              | -4.52619800 | 0.45307500  | -0.02706600 |
| H              | -2.78435700 | 2.57387600  | -0.51373700 | H              | -4.43011700 | -1.25551800 | 0.49682400  |
| H              | 1.93131600  | 0.94314000  | -0.22389700 | C              | -0.40342600 | -1.23018600 | 1.93393000  |
| O              | 2.67530300  | 0.31567600  | -0.03495300 | H              | -0.11006500 | -0.26730300 | 1.48279800  |
| C              | 3.75835900  | 1.06762200  | 0.53126800  | H              | -1.13128200 | -1.04594800 | 2.73594300  |
| H              | 4.13552900  | 1.81626500  | -0.18390200 | H              | 0.49018400  | -1.70848500 | 2.36440300  |
| H              | 4.56468500  | 0.35835400  | 0.76173300  | C              | 3.86461200  | -0.32590600 | -0.51083600 |
| H              | 3.45518800  | 1.57994500  | 1.45991900  | H              | 4.38653500  | -1.27936000 | -0.66892100 |
| H              | -1.49628500 | -1.22315700 | -0.61358900 | H              | 3.59202000  | 0.10132400  | -1.49086800 |
| O              | -2.31361400 | -0.70619000 | -0.38474500 | H              | 4.54447800  | 0.37060000  | 0.00593900  |
| C              | -3.17192700 | -1.58660000 | 0.35809800  | C              | 0.37371200  | -1.27453800 | -1.90231500 |
| H              | -2.70148900 | -1.90649300 | 1.30342400  | H              | -0.55789300 | -1.69921800 | -2.30014300 |
| H              | -3.42866700 | -2.47768100 | -0.23564200 | H              | 0.15503800  | -0.28681900 | -1.46359000 |
| H              | -4.09311200 | -1.03346200 | 0.58766400  | H              | 1.09175700  | -1.15185000 | -2.72980400 |
| <b>MeOH6_5</b> |             |             |             | <b>MeOH6_6</b> |             |             |             |
| O              | -0.12794800 | 1.95641400  | 0.20943500  | O              | 0.15826000  | 2.44298500  | 0.91057500  |
| H              | 0.72992400  | 1.73852500  | -0.23407200 | H              | 0.87960800  | 1.84074400  | 0.60355000  |
| O              | -2.29122800 | -1.24064300 | 0.73776300  | O              | -0.15815000 | -2.44207700 | 0.91136600  |
| H              | -2.43369800 | -0.38362000 | 0.26102500  | H              | -0.87953200 | -1.84013400 | 0.60388300  |
| O              | -2.47782600 | 1.04682700  | -0.65875400 | O              | -2.01658900 | -0.77823300 | -0.08123600 |
| H              | -1.58409800 | 1.42702400  | -0.45810600 | H              | -1.79027500 | 0.10021700  | -0.48282000 |
| O              | 2.29132400  | 1.24088000  | -0.73784000 | O              | -1.46337300 | 1.63477800  | -1.07863200 |
| H              | 2.43398000  | 0.38371300  | -0.26144700 | H              | -0.92280900 | 2.07027100  | -0.37267500 |



|                |             |             |             |                |             |             |             |
|----------------|-------------|-------------|-------------|----------------|-------------|-------------|-------------|
| O              | 2.47807100  | -1.04683100 | 0.65821000  | O              | 2.01613000  | 0.77835600  | -0.08147900 |
| H              | 1.58423000  | -1.42687700 | 0.45782100  | H              | 1.78868200  | -0.10025700 | -0.48210000 |
| O              | 0.12802200  | -1.95646400 | -0.20956400 | O              | 1.46424200  | -1.63526100 | -1.07775700 |
| H              | -0.72989100 | -1.73885100 | 0.23392500  | H              | 0.92361200  | -2.07055000 | -0.37173200 |
| C              | 3.45417700  | -2.03167800 | 0.28670600  | C              | -0.41215700 | 1.86202400  | 2.09392100  |
| H              | 3.40685400  | -2.26445100 | -0.79098000 | H              | -1.15466400 | 2.57309500  | 2.48014200  |
| H              | 4.44470400  | -1.61652300 | 0.51779000  | H              | -0.91165800 | 0.90265000  | 1.87349500  |
| H              | 3.31534500  | -2.96122300 | 0.86105300  | H              | 0.35623500  | 1.69884000  | 2.86721800  |
| C              | 3.27879900  | 2.16543300  | -0.25546000 | C              | 3.35887400  | 0.70388700  | 0.41622900  |
| H              | 3.05455200  | 3.14606700  | -0.69633300 | H              | 3.59489000  | 1.67560600  | 0.87134400  |
| H              | 3.24978200  | 2.25162200  | 0.84412800  | H              | 3.46235500  | -0.08526600 | 1.18021900  |
| H              | 4.29170600  | 1.86034600  | -0.56488600 | H              | 4.07333800  | 0.50869100  | -0.39935200 |
| C              | -0.05374900 | 1.39423500  | 1.53328100  | C              | 0.71510400  | -1.73064900 | -2.30189100 |
| H              | -1.01489600 | 1.58945200  | 2.02779200  | H              | 1.20525700  | -1.08051300 | -3.03933600 |
| H              | 0.11655400  | 0.30655400  | 1.50378700  | H              | 0.71978300  | -2.76505600 | -2.68053500 |
| H              | 0.74951200  | 1.87106300  | 2.11726400  | H              | -0.32733900 | -1.40237600 | -2.15938100 |
| C              | -3.27914100 | -2.16505000 | 0.25600300  | C              | 0.41190900  | -1.86042600 | 2.09456100  |
| H              | -3.05514200 | -3.14557900 | 0.69723400  | H              | 1.15455700  | -2.57111300 | 2.48122000  |
| H              | -4.29187500 | -1.85948000 | 0.56553000  | H              | 0.91115800  | -0.90100200 | 1.87379900  |
| H              | -3.25041500 | -2.25170900 | -0.84355900 | H              | -0.35666100 | -1.69711900 | 2.86765100  |
| C              | -3.45418400 | 2.03116100  | -0.28650000 | C              | -3.35973000 | -0.70525300 | 0.41575900  |
| H              | -4.44452600 | 1.61668000  | -0.51957400 | H              | -3.59478400 | -1.67710700 | 0.87107700  |
| H              | -3.40809900 | 2.26181800  | 0.79170100  | H              | -3.46453800 | 0.08403300  | 1.17942300  |
| H              | -3.31446000 | 2.96179500  | -0.85886000 | H              | -4.07399400 | -0.51123900 | -0.40027300 |
| C              | 0.05374100  | -1.39423400 | -1.53338800 | C              | -0.71433000 | 1.72998500  | -2.30281300 |
| H              | -0.11725200 | -0.30666600 | -1.50383300 | H              | -1.20408300 | 1.07918000  | -3.03993800 |
| H              | 1.01511900  | -1.58880100 | -2.02770000 | H              | -0.71963500 | 2.76419100  | -2.68200600 |
| H              | -0.74909800 | -1.87154000 | -2.11755500 | H              | 0.32831300  | 1.40241100  | -2.16016200 |
| <b>MeOH6_7</b> |             |             |             | <b>MeOH6_8</b> |             |             |             |
| H              | 1.74559000  | -1.44065000 | -2.21486100 | O              | 0.53336300  | -2.19352100 | -0.47681400 |
| C              | 2.74821700  | -1.19421100 | -1.82137100 | H              | 1.24931100  | -1.63754200 | -0.07265200 |
| H              | 3.18438800  | -2.10261100 | -1.37015400 | O              | -1.69850500 | -1.12487100 | 0.40335200  |
| H              | 3.38354400  | -0.88475400 | -2.66228100 | H              | -0.86623400 | -1.60051900 | 0.11488300  |
| O              | 2.70667800  | -0.10507200 | -0.89749300 | O              | 2.38615800  | -0.55102900 | 0.52822700  |
| H              | 2.17707100  | -0.39146000 | -0.12658400 | H              | 2.04523100  | 0.37462900  | 0.41378300  |
| H              | 2.23622000  | 2.18586600  | -0.03866200 | O              | 1.32573200  | 1.88482700  | 0.25269900  |
| C              | 1.73094100  | 2.69285600  | 0.79834900  | H              | 0.45435300  | 1.72430000  | 0.69011000  |
| H              | 2.41693500  | 2.75483500  | 1.65839500  | O              | -1.78866300 | 0.60884700  | -1.81009800 |
| H              | 1.45032800  | 3.71148600  | 0.49839200  | H              | -1.91930800 | -0.04585400 | -1.09819500 |
| O              | 0.51297500  | 2.01310000  | 1.16554800  | O              | -0.85813900 | 1.14435400  | 1.67499800  |
| H              | 0.73147500  | 1.06522700  | 1.30485500  | H              | -1.22133500 | 0.33338400  | 1.25120200  |
| H              | 0.42839900  | 0.74348300  | -1.65327000 | C              | 3.71485100  | -0.60554400 | -0.00946600 |
| C              | -0.38905300 | 1.40227700  | -1.98787600 | H              | 4.07271000  | -1.63823100 | 0.10100600  |
| H              | 0.04871400  | 2.27866500  | -2.49245000 | H              | 3.73194800  | -0.33418300 | -1.07920300 |
| H              | -1.02819400 | 0.86594500  | -2.70392700 | H              | 4.39110300  | 0.06678800  | 0.54239700  |
| O              | -1.22133700 | 1.81374800  | -0.88696800 | C              | 0.56326800  | -1.92990300 | -1.89476100 |
| H              | -0.62142800 | 1.97523500  | -0.11674700 | H              | 1.54992700  | -2.18324600 | -2.31395300 |
| H              | 1.66225500  | -2.41163500 | 2.30552000  | H              | -0.19426700 | -2.57238100 | -2.36289700 |
| C              | 1.52251300  | -1.33153000 | 2.46892600  | H              | 0.32207200  | -0.87741800 | -2.11477700 |
| H              | 0.81451600  | -1.17916900 | 3.29877800  | C              | -0.20772100 | 0.72045700  | 2.88880800  |
| H              | 2.48895000  | -0.88031000 | 2.73061500  | H              | 0.24282300  | 1.61303400  | 3.34239800  |
| O              | 1.05630900  | -0.68762100 | 1.26921600  | H              | -0.93549400 | 0.29040000  | 3.59553000  |

|                |             |             |             |                 |             |             |             |
|----------------|-------------|-------------|-------------|-----------------|-------------|-------------|-------------|
| H              | 0.22714300  | -1.15727700 | 0.96512600  | H               | 0.58643900  | -0.01691900 | 2.68372300  |
| H              | -4.58425900 | 1.03575200  | 0.11643700  | C               | -2.43927400 | 1.81678800  | -1.39541400 |
| C              | -3.93415800 | 0.29769400  | 0.61236800  | H               | -2.21459200 | 2.58105200  | -2.15225000 |
| H              | -3.50939100 | 0.74713300  | 1.52570400  | H               | -3.53446300 | 1.69210200  | -1.34189300 |
| H              | -4.53734200 | -0.57682500 | 0.89131500  | H               | -2.07129300 | 2.16592200  | -0.41528000 |
| O              | -2.90476600 | -0.15627000 | -0.27936800 | C               | 1.08499700  | 2.33436400  | -1.09450500 |
| H              | -2.32942200 | 0.62210400  | -0.50487800 | H               | 2.06011500  | 2.37486700  | -1.59925300 |
| H              | -0.68063200 | -1.92538200 | -1.65360400 | H               | 0.41347100  | 1.64891000  | -1.63471100 |
| C              | -0.82356200 | -2.63581300 | -0.82241700 | H               | 0.64927300  | 3.34643600  | -1.09331600 |
| H              | -1.65281900 | -3.31615200 | -1.07108900 | C               | -2.61812900 | -2.08420200 | 0.95131100  |
| H              | 0.09447500  | -3.22509700 | -0.68998800 | H               | -3.49698100 | -1.53098100 | 1.30846600  |
| O              | -1.08162200 | -1.94961400 | 0.41387000  | H               | -2.93641400 | -2.80750400 | 0.18396900  |
| H              | -1.82180800 | -1.30821700 | 0.23703600  | H               | -2.16591000 | -2.62766300 | 1.79616100  |
| <b>MeOH6_9</b> |             |             |             | <b>MeOH6_10</b> |             |             |             |
| O              | -3.32147700 | -0.23238900 | -0.91794000 | O               | -0.51843700 | -1.42888100 | -1.12735200 |
| H              | -2.80669800 | -0.43032100 | -0.11297500 | H               | 0.42044600  | -1.72493600 | -1.01641100 |
| O              | -0.29868500 | 1.66668900  | 0.06031200  | O               | 2.56081000  | 0.78101400  | -0.59817300 |
| H              | 0.64437700  | 1.74434000  | 0.35576700  | H               | 1.86090000  | 1.15680700  | -0.00566600 |
| O              | 2.49734200  | -0.91052300 | -0.36063400 | O               | 2.07604000  | -1.86768300 | -0.56677800 |
| H              | 1.62833200  | -1.36890700 | -0.22790500 | H               | 2.35037200  | -0.91977100 | -0.64622200 |
| O              | 0.16399300  | -2.16012600 | 0.04726200  | O               | -3.16921200 | 1.04616000  | -0.34458200 |
| H              | -0.42736500 | -1.60453100 | 0.60373800  | H               | -2.52124100 | 0.70970100  | 0.30236800  |
| O              | -1.49883500 | -0.35996400 | 1.22812200  | O               | 0.62669800  | 1.72066600  | 1.01072600  |
| H              | -1.03798700 | 0.45063300  | 0.86598500  | H               | 0.02465100  | 0.97603700  | 1.23178000  |
| O              | 2.32239500  | 1.58149600  | 0.62586800  | O               | -1.18294300 | -0.30872100 | 1.14478900  |
| H              | 2.45114700  | 0.64681600  | 0.32366400  | H               | -0.93396100 | -0.79791000 | 0.30565700  |
| C              | 3.09673800  | 2.41949400  | -0.24635600 | C               | 2.10240700  | -2.17283400 | 0.83668100  |
| H              | 2.85716600  | 3.46256100  | 0.00109800  | H               | 1.48559200  | -1.46338100 | 1.41604500  |
| H              | 4.17635100  | 2.25820200  | -0.09457700 | H               | 1.69841000  | -3.18681900 | 0.96141400  |
| H              | 2.85196500  | 2.23496500  | -1.30617000 | H               | 3.13246300  | -2.15267300 | 1.22807200  |
| C              | -0.25346200 | 1.35145200  | -1.34847300 | C               | 3.83201200  | 1.26707200  | -0.14062300 |
| H              | 0.53242200  | 0.60827400  | -1.56170400 | H               | 4.60664000  | 0.78757800  | -0.75420200 |
| H              | -1.22973000 | 0.93487100  | -1.62874900 | H               | 3.90546800  | 2.35944200  | -0.26528900 |
| H              | -0.06139300 | 2.26157100  | -1.93871000 | H               | 4.00438300  | 1.01448700  | 0.91915900  |
| C              | -1.80519700 | -0.13230500 | 2.61477400  | C               | -0.50913400 | -0.39137900 | -2.13515100 |
| H              | -2.32352300 | -1.02532700 | 2.98799300  | H               | -0.50881200 | -0.83884600 | -3.14086400 |
| H              | -0.88672700 | 0.02414100  | 3.20284300  | H               | -1.41773200 | 0.21045800  | -2.00039500 |
| H              | -2.46466700 | 0.74245000  | 2.73129600  | H               | 0.37676800  | 0.25491600  | -2.02553000 |
| C              | -3.91871400 | 1.05161900  | -0.70482700 | C               | -1.66847100 | -1.26280800 | 2.10386500  |
| H              | -4.41180500 | 1.34045400  | -1.64302600 | H               | -1.99005800 | -0.70416800 | 2.99270400  |
| H              | -4.67955300 | 1.02204000  | 0.09476500  | H               | -2.52722900 | -1.82226200 | 1.69897900  |
| H              | -3.16483600 | 1.81789700  | -0.45002000 | H               | -0.87754100 | -1.97419800 | 2.39248000  |
| C              | -0.59022800 | -2.54000200 | -1.12088200 | C               | -0.18618500 | 2.73831900  | 0.38993200  |
| H              | -1.09629900 | -1.67344200 | -1.57405800 | H               | -0.91189700 | 3.14998200  | 1.10815100  |
| H              | 0.12088400  | -2.96543100 | -1.84177500 | H               | 0.49215900  | 3.53929900  | 0.06769700  |
| H              | -1.34294200 | -3.30262300 | -0.86686700 | H               | -0.72941200 | 2.34539000  | -0.48381500 |
| C              | 3.52619200  | -1.78911000 | 0.12126300  | C               | -3.98101700 | -0.07413700 | -0.71416400 |
| H              | 3.52945400  | -2.73696400 | -0.44013100 | H               | -4.63225500 | 0.25313900  | -1.53590500 |
| H              | 4.48915400  | -1.28312700 | -0.03242100 | H               | -3.37105700 | -0.92594500 | -1.06460800 |
| H              | 3.40243800  | -2.00688700 | 1.19502300  | H               | -4.61838100 | -0.41215200 | 0.12211600  |

|                 |             |             |             |                 |             |             |             |
|-----------------|-------------|-------------|-------------|-----------------|-------------|-------------|-------------|
| <b>MeOH6_11</b> |             |             |             | <b>MeOH6_12</b> |             |             |             |
| O               | 2.76264100  | -0.19849600 | -0.51250800 | C               | 0.19460500  | -0.47243300 | 2.79622400  |
| H               | 2.20224500  | -0.43348600 | 0.24927900  | O               | 1.01745100  | 0.35407900  | 1.94949400  |
| O               | 0.70651200  | -0.54545600 | 1.39428000  | H               | 0.42749300  | 0.94182600  | 1.43023600  |
| H               | 0.47358900  | 0.43030200  | 1.33078600  | H               | 0.82272600  | -1.30143900 | 3.14814400  |
| O               | -0.70700000 | -1.81243600 | -0.53463500 | H               | -0.66984300 | -0.87521500 | 2.24719900  |
| H               | -0.18145800 | -1.38729200 | 0.18405200  | H               | -0.16363800 | 0.10003000  | 3.66632000  |
| O               | 0.16533900  | 1.99458100  | 1.12589700  | H               | 2.06630700  | -0.30284900 | 0.74214600  |
| H               | -0.34682200 | 2.05764800  | 0.27431800  | O               | 2.58909500  | -0.53192400 | -0.06431600 |
| O               | -2.76877500 | -0.06293600 | -0.70167500 | C               | 3.90024000  | 0.03549300  | 0.09093000  |
| H               | -2.12450400 | -0.80747400 | -0.71895600 | H               | 4.46158800  | -0.18656200 | -0.82639900 |
| O               | -1.06870900 | 1.99014900  | -1.23874900 | H               | 4.42554300  | -0.41446800 | 0.94824100  |
| H               | -1.74898800 | 1.28013800  | -1.13744700 | H               | 3.85476900  | 1.12869900  | 0.22849800  |
| C               | 0.50432600  | -0.97026400 | 2.75268600  | H               | 0.00777400  | 1.38536400  | -0.68085400 |
| H               | 0.83967400  | -2.01363200 | 2.82771200  | O               | -0.52938600 | 1.70776800  | 0.10246200  |
| H               | 1.09471800  | -0.35432600 | 3.44858000  | C               | -0.68374100 | 3.13454500  | -0.00269000 |
| H               | -0.56076200 | -0.91214600 | 3.03168700  | H               | -1.22613800 | 3.40491200  | -0.92241000 |
| C               | 1.40466600  | 2.70715300  | 0.92088500  | H               | 0.29610600  | 3.63705300  | 0.00148900  |
| H               | 1.20279600  | 3.73725500  | 0.58894700  | H               | -1.26346000 | 3.46836500  | 0.86819000  |
| H               | 1.92415600  | 2.74211200  | 1.88791700  | H               | 0.54039200  | -2.05174400 | 0.05325600  |
| H               | 2.04240500  | 2.19336600  | 0.18353100  | C               | -0.25517900 | -2.80416900 | -0.08258800 |
| C               | -3.10923200 | 0.14996500  | 0.67870600  | O               | -1.41501800 | -2.25822100 | -0.71801800 |
| H               | -2.22732300 | 0.44509700  | 1.27406000  | H               | 0.13054600  | -3.59640300 | -0.73904300 |
| H               | -3.84486400 | 0.96427100  | 0.71104400  | H               | -0.49654400 | -3.25288400 | 0.89699100  |
| H               | -3.55965300 | -0.75395700 | 1.11966500  | H               | -1.77105500 | -1.55492400 | -0.13768300 |
| C               | 2.68525200  | -1.27879000 | -1.44947300 | H               | 1.12541900  | -0.57558900 | -3.41663700 |
| H               | 1.64485100  | -1.47925500 | -1.75833600 | C               | 0.36685600  | -0.11119400 | -2.76774600 |
| H               | 3.26612800  | -0.98070700 | -2.33281500 | O               | 0.99768600  | 0.77286400  | -1.81355500 |
| H               | 3.12520200  | -2.20619600 | -1.04214200 | H               | -0.29283400 | 0.50960500  | -3.38911600 |
| C               | -0.56416000 | -3.23349200 | -0.41146100 | H               | -0.22674400 | -0.89006500 | -2.26412900 |
| H               | -1.12173400 | -3.69218700 | -1.23858600 | H               | 1.63001000  | 0.23929000  | -1.26933900 |
| H               | 0.49458200  | -3.53198000 | -0.48874700 | H               | -4.39488300 | -0.67438900 | 0.06121000  |
| H               | -0.97484200 | -3.60320700 | 0.54347000  | C               | -3.67768500 | 0.12374200  | -0.17053000 |
| C               | -0.07266900 | 1.49583200  | -2.15796500 | O               | -2.52354000 | -0.08934100 | 0.65963500  |
| H               | -0.54816200 | 1.07959900  | -3.05951000 | H               | -3.41980700 | 0.06802800  | -1.24177400 |
| H               | 0.55241800  | 2.35079600  | -2.44871500 | H               | -4.14806700 | 1.09779200  | 0.04235700  |
| H               | 0.56717400  | 0.72957800  | -1.69094800 | H               | -1.87653500 | 0.61787200  | 0.44588600  |
| <b>MeOH6_13</b> |             |             |             | <b>MeOH6_14</b> |             |             |             |
| O               | -0.26027100 | 1.53592300  | -0.32615800 | O               | -2.41885700 | -0.03359300 | 1.00069100  |
| H               | -0.04530900 | 0.59310300  | -0.14685200 | H               | -1.75506900 | -0.76624500 | 1.08993600  |
| O               | 0.01907500  | -1.17348000 | 0.12823600  | O               | 1.02324100  | 1.98487800  | 0.84390900  |
| H               | -0.94090700 | -1.35059000 | 0.31681300  | H               | 0.32066200  | 1.85671900  | 0.17118000  |
| O               | -2.62099800 | -1.36676900 | 0.45312400  | O               | 2.79701500  | -0.02784600 | 0.24919300  |
| H               | -2.84493100 | -0.43830300 | 0.18639200  | H               | 2.22738100  | 0.75128600  | 0.43469800  |
| O               | 3.19226600  | 0.00341300  | -0.74152100 | O               | -1.06540600 | 1.30285800  | -0.83628000 |
| H               | 2.96787500  | -0.27219500 | 0.17415100  | H               | -1.62914400 | 0.86021800  | -0.13930700 |
| O               | -2.93262800 | 1.18950300  | -0.31997600 | O               | -0.66679000 | -2.02553300 | 0.76754100  |
| H               | -1.97351400 | 1.42610300  | -0.38422900 | H               | -0.45119400 | -1.85635200 | -0.18062800 |
| O               | 2.22047400  | -0.74842100 | 1.73060500  | O               | -0.28324000 | -1.19513300 | -1.79801100 |
| H               | 1.39297900  | -1.05706300 | 1.30599500  | H               | -0.45103700 | -0.24620000 | -1.61980200 |
| C               | -3.34471300 | -2.26270600 | -0.40464500 | C               | -1.88987300 | 2.24659700  | -1.54423500 |
| H               | -3.12999200 | -2.06839200 | -1.46905400 | H               | -2.33281800 | 2.98003100  | -0.85184800 |

|                 |             |             |             |                 |             |             |             |
|-----------------|-------------|-------------|-------------|-----------------|-------------|-------------|-------------|
| H               | -3.02769000 | -3.28429000 | -0.15458900 | H               | -1.24628900 | 2.77434000  | -2.26016800 |
| H               | -4.43013600 | -2.17814400 | -0.23684400 | H               | -2.69355500 | 1.73169700  | -2.09504700 |
| C               | -3.53863900 | 2.08841500  | 0.62307600  | C               | -3.60028300 | -0.62502400 | 0.42714000  |
| H               | -3.49491300 | 3.12769200  | 0.26055300  | H               | -4.34238200 | 0.17637000  | 0.30837700  |
| H               | -4.59159400 | 1.79374200  | 0.72635600  | H               | -3.38654400 | -1.07437600 | -0.55754300 |
| H               | -3.04989600 | 2.02863000  | 1.60969200  | H               | -4.01300800 | -1.39794900 | 1.09328900  |
| C               | 0.46590800  | 1.93076800  | -1.51051700 | C               | 4.06816200  | 0.45985800  | -0.18610400 |
| H               | 0.01508500  | 1.49132400  | -2.41650100 | H               | 4.55450500  | 1.08307700  | 0.58389700  |
| H               | 0.40041000  | 3.02481300  | -1.57681800 | H               | 4.70548400  | -0.41412500 | -0.38114200 |
| H               | 1.51897200  | 1.62301300  | -1.43639300 | H               | 3.98643500  | 1.04923000  | -1.11683400 |
| C               | 1.89313500  | 0.45948600  | 2.44165300  | C               | 1.02400900  | -1.32154600 | -2.39693700 |
| H               | 2.82466600  | 0.83025500  | 2.88961800  | H               | 1.18396500  | -2.39269000 | -2.57911300 |
| H               | 1.48420000  | 1.22817300  | 1.76518200  | H               | 1.06186000  | -0.79254500 | -3.36296500 |
| H               | 1.16849600  | 0.26046600  | 3.24780600  | H               | 1.80644800  | -0.93989800 | -1.72305600 |
| C               | 4.61733100  | 0.07948500  | -0.83397200 | C               | 0.55416900  | -2.35928600 | 1.45753000  |
| H               | 5.09490600  | -0.89051700 | -0.61261900 | H               | 1.37218600  | -1.67511300 | 1.18462400  |
| H               | 4.86378400  | 0.36315000  | -1.86665000 | H               | 0.35102900  | -2.28131000 | 2.53454900  |
| H               | 5.03250300  | 0.84271300  | -0.15268500 | H               | 0.85160400  | -3.39589100 | 1.23066100  |
| C               | 0.33266000  | -1.77257600 | -1.14945300 | C               | 0.47119000  | 1.53924000  | 2.09706300  |
| H               | -0.36154800 | -1.41236400 | -1.92670000 | H               | 1.22375300  | 1.74284200  | 2.86975700  |
| H               | 1.35610400  | -1.46946500 | -1.40491300 | H               | -0.45346300 | 2.08505900  | 2.34160700  |
| H               | 0.27300900  | -2.87043500 | -1.08905300 | H               | 0.25722800  | 0.45775300  | 2.08179400  |
| <b>MeOH6_15</b> |             |             |             | <b>MeOH6_16</b> |             |             |             |
| O               | -0.31584500 | 1.01570500  | 0.81028100  | O               | -1.08868600 | 1.35820600  | -1.01157600 |
| H               | 0.61409600  | 1.36751800  | 0.81454600  | H               | -0.70862300 | 1.12886800  | -0.13315900 |
| O               | 0.26008200  | -1.69061400 | 0.74775800  | O               | 0.47800000  | -1.93156700 | 0.76655800  |
| H               | -0.15239700 | -0.80329700 | 0.82121600  | H               | 1.17401600  | -1.66187900 | 0.11747700  |
| O               | -3.19999000 | -0.62588600 | 0.22472100  | O               | 2.45408900  | -0.94299300 | -0.78603100 |
| H               | -2.64175600 | -0.43615400 | -0.55479200 | H               | 2.42439400  | -0.02070100 | -0.43675300 |
| O               | -1.40502900 | 0.44182600  | -1.62224700 | O               | -0.15983000 | 0.53781500  | 1.44694800  |
| H               | -1.00296700 | 0.81124000  | -0.80620000 | H               | 0.00627200  | -0.43198500 | 1.27503000  |
| O               | 2.24673600  | 1.64604600  | 0.51168100  | O               | 2.22650700  | 1.45778700  | 0.47934600  |
| H               | 2.50389800  | 0.71871800  | 0.27280200  | H               | 1.43597600  | 1.27091700  | 1.02884000  |
| O               | 2.65823600  | -0.92359500 | -0.18633000 | O               | -3.13033500 | -0.37415000 | -0.28453900 |
| H               | 1.79337000  | -1.31170900 | 0.09880200  | H               | -2.52802800 | 0.31811000  | -0.62920600 |
| C               | 2.40120100  | 2.44763500  | -0.67185400 | C               | 2.05758400  | 2.76234400  | -0.10488500 |
| H               | 2.11385800  | 3.47509300  | -0.41138100 | H               | 2.83826500  | 2.87806100  | -0.86857000 |
| H               | 3.44787100  | 2.44706000  | -1.01444000 | H               | 1.06723200  | 2.86661400  | -0.57626800 |
| H               | 1.75427200  | 2.08861500  | -1.49000900 | H               | 2.18523200  | 3.55007800  | 0.65462900  |
| C               | 3.70159000  | -1.65304200 | 0.48052200  | C               | 3.70977300  | -1.51192900 | -0.37363700 |
| H               | 3.72583400  | -2.70186100 | 0.14412400  | H               | 3.81231000  | -1.50822200 | 0.72400200  |
| H               | 4.65489900  | -1.17506700 | 0.21780400  | H               | 3.72910600  | -2.54970000 | -0.73223000 |
| H               | 3.57529400  | -1.62705400 | 1.57537500  | H               | 4.55548000  | -0.96472800 | -0.81917100 |
| C               | -1.07735600 | 1.59639800  | 1.88656400  | C               | -1.19295200 | 0.65418500  | 2.44806000  |
| H               | -1.23662600 | 2.67345600  | 1.71903700  | H               | -0.87597600 | 0.17639400  | 3.38788700  |
| H               | -2.04334800 | 1.07635200  | 1.90306200  | H               | -1.35391700 | 1.72579100  | 2.62634600  |
| H               | -0.56503900 | 1.44784200  | 2.84975000  | H               | -2.12723100 | 0.19782900  | 2.08646800  |
| C               | -0.33387500 | -0.00628000 | -2.46519200 | C               | -4.46855600 | 0.00828900  | -0.61310300 |
| H               | -0.76361700 | -0.68965900 | -3.21017100 | H               | -5.13743400 | -0.76154100 | -0.20417600 |
| H               | 0.13382900  | 0.83971400  | -2.99631000 | H               | -4.73838100 | 0.98144600  | -0.16690700 |
| H               | 0.44067500  | -0.54192000 | -1.89152500 | H               | -4.62405100 | 0.06372500  | -1.70460300 |
| C               | -4.29704200 | 0.29107800  | 0.17914800  | C               | -0.32749000 | 0.64646200  | -2.00322700 |

|                 |             |             |             |                 |             |             |             |
|-----------------|-------------|-------------|-------------|-----------------|-------------|-------------|-------------|
| H               | -4.88439400 | 0.14179300  | 1.09602500  | H               | -0.79181100 | 0.85539600  | -2.97605900 |
| H               | -3.95394200 | 1.34052100  | 0.14480500  | H               | 0.72019100  | 0.98597000  | -2.02912100 |
| H               | -4.95062000 | 0.10702500  | -0.69061300 | H               | -0.34349400 | -0.44132200 | -1.82593600 |
| C               | -0.68737100 | -2.60775600 | 0.16761400  | C               | -0.53803100 | -2.69258700 | 0.07634600  |
| H               | -0.89954900 | -2.35358300 | -0.88347500 | H               | -0.10517500 | -3.21530700 | -0.79030900 |
| H               | -0.23001800 | -3.60499400 | 0.21184600  | H               | -0.92806800 | -3.43975900 | 0.78108900  |
| H               | -1.63002300 | -2.60570100 | 0.73199400  | H               | -1.36619900 | -2.04543300 | -0.25227500 |
| <b>MeOH6_17</b> |             |             |             | <b>MeOH6_18</b> |             |             |             |
| O               | 3.05090400  | 1.17730900  | 0.29113200  | O               | 0.56462000  | 2.13813900  | -0.25549300 |
| O               | 2.38449500  | -1.36640200 | 1.03592100  | H               | 0.49142300  | 1.45825700  | 0.44143300  |
| O               | -0.26600100 | -0.66589900 | 1.19334600  | O               | 0.50348100  | -1.61151600 | -0.50673400 |
| O               | 0.47517500  | 1.20872500  | -0.51140300 | H               | -0.25098000 | -1.23824200 | -1.04162100 |
| O               | -3.12416100 | 0.81574200  | -0.25758900 | O               | 3.02442200  | -0.53295300 | 0.09804800  |
| O               | -1.98776600 | -1.67087600 | -0.73568200 | H               | 2.20804800  | -0.85366000 | -0.32504600 |
| H               | 2.92845100  | 0.27092400  | 0.66377600  | O               | -2.48613600 | 0.29833500  | 0.75318400  |
| H               | 1.45487500  | -1.19858300 | 1.30882600  | H               | -1.62998400 | 0.29448700  | 1.23342400  |
| H               | -0.06229900 | 0.10488900  | 0.59193000  | O               | 0.10284000  | 0.04071500  | 1.60566600  |
| H               | 1.42807200  | 1.35322600  | -0.29193300 | H               | 0.35107600  | -0.67468600 | 0.97377900  |
| H               | -2.81493000 | -0.08426900 | -0.49740900 | O               | -1.59195800 | -0.51625100 | -1.69756800 |
| H               | -1.35737600 | -1.50046100 | -0.00313900 | H               | -1.97590200 | -0.09922500 | -0.88987300 |
| C               | -4.47142200 | 0.69249200  | 0.20552600  | C               | -3.23619900 | -0.83454600 | 1.22581900  |
| H               | -4.80558100 | 1.69390500  | 0.51085900  | H               | -3.48040800 | -0.72975500 | 2.29475900  |
| H               | -5.14622500 | 0.32306600  | -0.58567600 | H               | -4.16885700 | -0.86895600 | 0.64784800  |
| H               | -4.54588200 | 0.01637000  | 1.07607300  | H               | -2.68361400 | -1.77694800 | 1.07024300  |
| C               | -1.23533900 | -1.59317200 | -1.96009400 | C               | -0.50865300 | 3.06573800  | -0.05290200 |
| H               | -1.95831900 | -1.64343700 | -2.78490700 | H               | -0.45648400 | 3.80155900  | -0.86731000 |
| H               | -0.67331100 | -0.64696100 | -2.02622200 | H               | -1.49434700 | 2.57018100  | -0.08288800 |
| H               | -0.53837900 | -2.44282900 | -2.05064600 | H               | -0.40945400 | 3.60146500  | 0.90696800  |
| C               | 2.29974200  | -2.04371800 | -0.23143200 | C               | 0.44968600  | -3.04700200 | -0.56884100 |
| H               | 3.32718900  | -2.25921100 | -0.55378000 | H               | 1.30006300  | -3.43062300 | 0.01043500  |
| H               | 1.75046600  | -2.99365100 | -0.13564000 | H               | -0.48863300 | -3.42898600 | -0.13456000 |
| H               | 1.80508600  | -1.41434700 | -0.99135900 | H               | 0.53658400  | -3.39837700 | -1.60868800 |
| C               | 4.08096600  | 1.09861100  | -0.70639500 | C               | 1.01042200  | 0.01176000  | 2.72923400  |
| H               | 4.26219300  | 2.11892700  | -1.06941400 | H               | 0.79979800  | 0.90432400  | 3.33278300  |
| H               | 5.01634300  | 0.70321500  | -0.27908500 | H               | 0.84050000  | -0.88634300 | 3.34384500  |
| H               | 3.77479000  | 0.46586000  | -1.55707400 | H               | 2.05026400  | 0.03245800  | 2.37265200  |
| C               | -1.02303500 | -0.15841100 | 2.31464800  | C               | 3.55329400  | 0.52051700  | -0.72228000 |
| H               | -1.32559900 | -1.02281900 | 2.92014300  | H               | 2.81993600  | 1.33080700  | -0.86271200 |
| H               | -0.40408700 | 0.51315300  | 2.93101600  | H               | 4.43310600  | 0.91986300  | -0.19932500 |
| H               | -1.91499400 | 0.37909300  | 1.95829200  | H               | 3.87686300  | 0.14143000  | -1.70730700 |
| C               | -0.20207700 | 2.48313700  | -0.55105400 | C               | -1.27345500 | 0.52767200  | -2.64328300 |
| H               | 0.12463900  | 3.06496200  | -1.42731400 | H               | -0.49553400 | 1.19645600  | -2.24409100 |
| H               | -1.27620300 | 2.27188600  | -0.62420100 | H               | -0.90641000 | 0.03200600  | -3.55162300 |
| H               | -0.00310900 | 3.06466200  | 0.36388400  | H               | -2.17577600 | 1.10593300  | -2.89643300 |
| <b>MeOH6_19</b> |             |             |             | <b>MeOH6_20</b> |             |             |             |
| O               | 0.74239000  | 2.21970000  | -0.88913000 | H               | -2.07474500 | -2.28144000 | 0.85904900  |
| H               | 0.79111700  | 1.27991300  | -1.16970100 | C               | -2.94912300 | -2.19008500 | 0.19229700  |
| O               | 0.77811300  | -0.52518500 | -1.21721900 | H               | -3.13594600 | -3.16086600 | -0.28743700 |
| H               | 0.20770400  | -0.71575600 | -0.43250800 | H               | -3.83386500 | -1.92779100 | 0.79818900  |

|                 |             |             |             |                 |             |             |             |
|-----------------|-------------|-------------|-------------|-----------------|-------------|-------------|-------------|
| O               | -0.64483700 | -0.73785600 | 1.08072900  | O               | -2.72358600 | -1.24153000 | -0.85754200 |
| H               | -0.76170800 | 0.24604000  | 1.21468300  | H               | -2.54018300 | -0.38116100 | -0.43733200 |
| O               | 3.07767100  | -0.51449600 | 0.38149100  | H               | 0.33735300  | 0.53792400  | 3.27046100  |
| H               | 2.38599400  | -0.58108700 | -0.30415300 | C               | 0.78574100  | -0.04106800 | 2.44819600  |
| O               | -2.65979200 | -1.24471000 | -0.77006300 | H               | 1.46175000  | 0.60209100  | 1.86147600  |
| H               | -2.06403800 | -1.20847300 | 0.00127100  | H               | 1.36434500  | -0.86999300 | 2.87678100  |
| O               | -0.99084300 | 1.87587900  | 1.13898600  | O               | -0.23839900 | -0.62856900 | 1.61939100  |
| H               | -0.34455200 | 2.11007400  | 0.42428500  | H               | -0.86393000 | 0.08493400  | 1.36321500  |
| C               | -4.00145700 | -1.31640600 | -0.27956500 | H               | -0.62267000 | -2.13585400 | -1.71096400 |
| H               | -4.66631200 | -1.32144800 | -1.15389500 | C               | 0.46844300  | -2.11510200 | -1.57559900 |
| H               | -4.17808200 | -2.23806700 | 0.30139200  | H               | 0.80717200  | -3.02910800 | -1.06301300 |
| H               | -4.25588800 | -0.44524900 | 0.34968900  | H               | 0.96537400  | -2.04722800 | -2.55204100 |
| C               | 2.07549900  | 2.63512000  | -0.52333200 | O               | 0.85567400  | -0.94169300 | -0.82500100 |
| H               | 2.72187600  | 2.69192800  | -1.41320900 | H               | 0.41508700  | -0.96948100 | 0.06231500  |
| H               | 1.98703000  | 3.63702900  | -0.08340500 | H               | -3.33818700 | 2.53880300  | -0.24153800 |
| H               | 2.52519500  | 1.94702000  | 0.20914300  | C               | -2.75960100 | 2.27583700  | 0.65799100  |
| C               | -2.30982800 | 2.12738900  | 0.61488600  | H               | -2.21436000 | 3.16443800  | 1.01459400  |
| H               | -2.52956900 | 1.47628600  | -0.24760900 | H               | -3.45016400 | 1.94106200  | 1.44319300  |
| H               | -3.02439500 | 1.91506700  | 1.42170100  | O               | -1.85826900 | 1.18937300  | 0.38671800  |
| H               | -2.41434800 | 3.18164800  | 0.31576800  | H               | -1.22798400 | 1.45936100  | -0.33671900 |
| C               | 3.59070900  | -1.83218000 | 0.59363900  | H               | 1.84412300  | 2.35964200  | -1.95974000 |
| H               | 4.09168300  | -2.22889700 | -0.30642800 | C               | 1.03781600  | 2.46814300  | -1.21924700 |
| H               | 4.32956000  | -1.76691000 | 1.40388600  | H               | 1.45530400  | 2.29143000  | -0.21564000 |
| H               | 2.79789300  | -2.53900200 | 0.89812000  | H               | 0.63015400  | 3.48603000  | -1.27823100 |
| C               | 0.13149900  | -1.26528500 | 2.17666500  | O               | -0.04949300 | 1.56492500  | -1.50961800 |
| H               | 0.16826800  | -2.35594800 | 2.05313700  | H               | 0.30094900  | 0.64787400  | -1.43119300 |
| H               | 1.15435600  | -0.85815200 | 2.15852200  | H               | 4.54602200  | -1.36096500 | -0.15786800 |
| H               | -0.34931000 | -1.03029000 | 3.13845400  | C               | 4.12415000  | -0.63265400 | 0.55656200  |
| C               | 0.27076500  | -1.25898300 | -2.35425200 | H               | 3.61642100  | -1.18607000 | 1.36694200  |
| H               | 0.83004900  | -0.91275500 | -3.23286400 | H               | 4.94985500  | -0.05458400 | 0.99344700  |
| H               | 0.43581200  | -2.33982000 | -2.22301900 | O               | 3.24745400  | 0.29714300  | -0.08395800 |
| H               | -0.80305900 | -1.06772900 | -2.48985500 | H               | 2.49653300  | -0.21666200 | -0.43906200 |
| <b>MeOH6_21</b> |             |             |             | <b>MeOH6_22</b> |             |             |             |
| C               | 0.20650600  | -2.94187800 | -0.30288800 | C               | -0.37985700 | -1.84994100 | -1.40968200 |
| O               | -0.58278500 | -1.73239600 | -0.34165500 | O               | -0.55548700 | -1.13831500 | -0.16560600 |
| H               | -0.37031600 | -1.19503200 | 0.46024200  | H               | -0.23996500 | -0.20620900 | -0.33093000 |
| H               | 0.05294100  | -3.45446300 | -1.26167200 | H               | -0.66133100 | -2.89620900 | -1.23144500 |
| H               | -0.13162600 | -3.60022200 | 0.51264000  | H               | 0.67049800  | -1.80813500 | -1.74065500 |
| H               | 1.27263800  | -2.70420000 | -0.17005600 | H               | -1.02649400 | -1.42996300 | -2.19667100 |
| H               | -2.48118100 | -1.41555200 | -0.18537800 | H               | 0.89362900  | -1.54773500 | 0.84743600  |
| O               | -3.27051300 | -0.86202400 | -0.04732400 | O               | 1.79658300  | -1.54185600 | 1.23595900  |
| C               | -2.99395200 | 0.38774900  | -0.68553000 | C               | 1.78566900  | -0.54592900 | 2.27789400  |
| H               | -3.88385700 | 1.01927100  | -0.55745600 | H               | 2.78223200  | -0.55279500 | 2.73906200  |
| H               | -2.79626800 | 0.26896200  | -1.76476800 | H               | 1.03771900  | -0.79049700 | 3.04830700  |
| H               | -2.12963900 | 0.89951200  | -0.22691000 | H               | 1.57731900  | 0.45789300  | 1.87046900  |
| O               | 0.30975100  | 0.21715900  | -2.07064000 | O               | -3.22722400 | -0.91030900 | 0.53862100  |
| C               | 1.66589600  | -0.16521700 | -2.38518500 | C               | -3.89183500 | -1.06882800 | -0.72413700 |
| H               | -0.08201800 | -0.53384600 | -1.56875700 | H               | -2.27695400 | -1.09441200 | 0.37638900  |
| H               | 2.15498100  | 0.71467500  | -2.82380500 | H               | -4.95848100 | -0.86990300 | -0.55697000 |
| H               | 1.67664100  | -0.98109000 | -3.12544800 | H               | -3.78053400 | -2.09518400 | -1.11243900 |
| H               | 2.20772600  | -0.47831200 | -1.47899700 | H               | -3.51128500 | -0.35281500 | -1.47398600 |
| H               | -2.15943600 | 0.11717100  | 2.10905800  | H               | -0.93066900 | 1.13305400  | 1.80909700  |

|                 |             |             |             |                 |             |             |             |
|-----------------|-------------|-------------|-------------|-----------------|-------------|-------------|-------------|
| C               | -1.18564000 | 0.16033000  | 2.62095400  | C               | -1.54772400 | 2.00197100  | 1.52114300  |
| O               | -0.10277000 | 0.02210000  | 1.67532800  | O               | -2.33087800 | 1.73480900  | 0.35460600  |
| H               | -1.10989100 | -0.68077900 | 3.32221100  | H               | -0.87402100 | 2.83646300  | 1.28160700  |
| H               | -1.08975800 | 1.10246300  | 3.18226100  | H               | -2.17965800 | 2.29055000  | 2.37884300  |
| H               | -0.04141100 | 0.84796300  | 1.12916400  | H               | -2.80422700 | 0.89484600  | 0.51960100  |
| H               | 0.18942600  | 3.79281800  | -1.14042600 | H               | 4.97957500  | -0.49371900 | -0.23508800 |
| C               | -0.34116500 | 3.22862500  | -0.35704400 | C               | 4.24634600  | 0.29656400  | -0.46216300 |
| O               | 0.33460400  | 1.99571400  | -0.06828200 | O               | 2.98598200  | -0.26679100 | -0.85903200 |
| H               | -0.34706100 | 3.82360100  | 0.56613700  | H               | 4.61829500  | 0.89202200  | -1.30649100 |
| H               | -1.38123200 | 3.05626100  | -0.68026000 | H               | 4.13694400  | 0.95314900  | 0.41802200  |
| H               | 0.32051700  | 1.42753800  | -0.88261200 | H               | 2.66683200  | -0.83351300 | -0.11492100 |
| H               | 4.21732800  | 0.09399100  | 0.34935400  | H               | 0.33217100  | 1.63846300  | -2.62698800 |
| C               | 3.34920000  | 0.33846800  | 0.97707500  | C               | 0.27371400  | 2.08548700  | -1.62048400 |
| O               | 2.49562800  | -0.81530600 | 0.97939600  | O               | 0.69521100  | 1.15066900  | -0.60921600 |
| H               | 3.70967800  | 0.57822900  | 1.99167600  | H               | -0.76787900 | 2.34312600  | -1.39197500 |
| H               | 2.83609400  | 1.22025200  | 0.55770900  | H               | 0.89713800  | 2.99365700  | -1.59355400 |
| H               | 1.68932300  | -0.56966200 | 1.46721400  | H               | 1.58776800  | 0.79626800  | -0.83479600 |
| <b>MeOH6_23</b> |             |             |             | <b>MeOH6_24</b> |             |             |             |
| O               | -0.99540500 | 1.43011800  | -0.05796600 | O               | -2.00495000 | -1.64939900 | -0.75290800 |
| O               | -0.83077200 | -1.21362500 | -0.32720000 | H               | -1.03226100 | -1.77049300 | -0.82353300 |
| O               | 1.84138000  | -1.08450000 | -0.83652700 | O               | 3.24091100  | -0.27162800 | -0.42820400 |
| O               | 2.14432600  | -0.04898800 | 1.76833900  | H               | 2.42657800  | -0.69039000 | -0.75745400 |
| O               | -3.68862500 | 0.45125900  | 0.14325000  | O               | 0.75684300  | -1.74100900 | -0.54008000 |
| O               | 1.36519000  | 1.45012900  | -1.47725100 | H               | 0.65876400  | -1.05487300 | 0.16652300  |
| H               | -0.95860300 | 0.43929500  | -0.05191600 | O               | -0.27455300 | 1.66103800  | -1.10848000 |
| H               | 0.10224100  | -1.45266000 | -0.51180300 | H               | 0.10181200  | 1.26499500  | -0.30074900 |
| H               | 1.70916800  | -0.15151700 | -1.16581700 | O               | 0.38195300  | 0.24175100  | 1.22794200  |
| H               | 2.14805600  | -0.52673800 | 0.91678200  | H               | -0.57226400 | 0.13969600  | 1.50458600  |
| H               | -2.90759200 | 1.00365700  | -0.03741300 | O               | -2.20300300 | -0.15485600 | 1.50681300  |
| H               | 0.47991500  | 1.56474400  | -1.05785300 | H               | -2.22898800 | -0.76252000 | 0.72416300  |
| C               | 2.28432900  | 2.31078900  | -0.77108800 | C               | -2.93106400 | 1.03243300  | 1.13488000  |
| H               | 2.39671500  | 1.99866600  | 0.27940200  | H               | -2.87088600 | 1.72863800  | 1.98228100  |
| H               | 3.25379900  | 2.23186200  | -1.28083300 | H               | -2.49315700 | 1.50205900  | 0.23903000  |
| H               | 1.94674600  | 3.35792600  | -0.81739800 | H               | -3.99074200 | 0.79588900  | 0.94900900  |
| C               | 2.72929200  | -1.76625600 | -1.73949700 | C               | 3.14657600  | 1.13428500  | -0.68184100 |
| H               | 3.71967100  | -1.28436800 | -1.75692100 | H               | 2.84632700  | 1.34699000  | -1.72087000 |
| H               | 2.84066000  | -2.79627300 | -1.37604100 | H               | 2.42879800  | 1.62492400  | -0.00091800 |
| H               | 2.31513200  | -1.78551000 | -2.75985400 | H               | 4.14398200  | 1.55924700  | -0.50459300 |
| C               | -4.05599500 | -0.16732800 | -1.09566000 | C               | 1.24383600  | 0.31181000  | 2.38138300  |
| H               | -3.21755600 | -0.73942800 | -1.52919700 | H               | 2.27242400  | 0.17992500  | 2.02069000  |
| H               | -4.88390000 | -0.85593300 | -0.87750800 | H               | 1.14689900  | 1.28829500  | 2.88113800  |
| H               | -4.40384200 | 0.57393700  | -1.83530500 | H               | 1.00182400  | -0.48843500 | 3.09817600  |
| C               | 1.36017600  | -0.81460000 | 2.68777700  | C               | -0.13096600 | 3.07910200  | -0.99144100 |
| H               | 1.41815200  | -0.31027900 | 3.66204700  | H               | -0.61719900 | 3.52812700  | -1.86821400 |
| H               | 0.30020600  | -0.86377400 | 2.38172400  | H               | -0.62084800 | 3.46788100  | -0.08071800 |
| H               | 1.74826100  | -1.84123400 | 2.80395100  | H               | 0.92942600  | 3.38675600  | -0.98299300 |
| C               | -1.49724600 | -2.25936200 | 0.39881600  | C               | 1.24531200  | -2.93918000 | 0.09873800  |
| H               | -2.45322800 | -1.84268800 | 0.74148900  | H               | 1.34721200  | -3.70381200 | -0.68180600 |
| H               | -1.68790600 | -3.12763300 | -0.25216200 | H               | 2.22994900  | -2.76119600 | 0.56005700  |
| H               | -0.90645400 | -2.58310200 | 1.27063200  | H               | 0.53756600  | -3.29823100 | 0.86399200  |
| C               | -0.74895900 | 1.87837200  | 1.29500000  | C               | -2.43137100 | -0.91440600 | -1.92009100 |
| H               | -0.78536900 | 2.97564500  | 1.28066700  | H               | -3.50303300 | -0.70893200 | -1.79319100 |

|                 |             |             |             |                 |             |             |             |
|-----------------|-------------|-------------|-------------|-----------------|-------------|-------------|-------------|
| H               | -1.53272900 | 1.50524900  | 1.97415200  | H               | -1.87940700 | 0.03352800  | -2.01498600 |
| H               | 0.24011600  | 1.54532800  | 1.64593600  | H               | -2.29431900 | -1.51950300 | -2.83005200 |
| <b>MeOH6_25</b> |             |             |             | <b>MeOH6_26</b> |             |             |             |
| O               | 2.83165300  | 0.85425400  | -0.84488700 | O               | 0.58277300  | 2.05772700  | 0.53737400  |
| H               | 2.31190100  | 0.64738000  | -0.03908500 | O               | -0.97642100 | 0.08362200  | 1.30139600  |
| O               | 1.31447000  | 0.07346500  | 1.33647600  | O               | 0.03243000  | -2.38366200 | 0.51701000  |
| H               | 0.89160100  | -0.73249800 | 0.93937700  | O               | 1.81064000  | 0.89281700  | -1.51616300 |
| O               | 0.22012400  | -2.01532200 | 0.07965100  | O               | 3.74674100  | -0.47219300 | -0.10721200 |
| H               | -0.68295500 | -1.71279600 | -0.19491600 | O               | -2.39869500 | 0.37216500  | -1.09645300 |
| C               | 4.04175000  | 0.10179700  | -0.75366600 | H               | 1.08074200  | 1.65159100  | -0.22263600 |
| H               | 3.84831100  | -0.98403700 | -0.68075500 | H               | -0.35462400 | 0.83364900  | 1.07477300  |
| H               | 4.61765600  | 0.28981100  | -1.67036400 | H               | -0.31505300 | -1.54280100 | 0.87725700  |
| H               | 4.65486500  | 0.40911300  | 0.11244800  | H               | 2.59464300  | 0.42676700  | -1.15455200 |
| C               | 2.03832000  | -0.33936300 | 2.50371600  | H               | 4.51382600  | 0.05134100  | 0.16149200  |
| H               | 1.36119000  | -0.76132700 | 3.26473100  | H               | -1.96835600 | 0.22838400  | -0.23033300 |
| H               | 2.81150700  | -1.08797000 | 2.25959800  | C               | -3.71488000 | -0.17938400 | -1.01051400 |
| H               | 2.52711700  | 0.55246600  | 2.91956300  | H               | -4.19459100 | -0.03333900 | -1.98786300 |
| C               | 0.98554600  | -2.21109500 | -1.12466600 | H               | -3.69323700 | -1.26121500 | -0.78907600 |
| H               | 0.38335200  | -2.72739900 | -1.88839300 | H               | -4.32535000 | 0.32766900  | -0.24228800 |
| H               | 1.35064400  | -1.25280600 | -1.53022500 | C               | -1.56836500 | 0.35885800  | 2.58135100  |
| H               | 1.84674700  | -2.84391300 | -0.86858100 | H               | -2.22945900 | 1.24001200  | 2.53184400  |
| O               | -2.19465700 | -1.18441100 | -0.71939000 | H               | -2.16350200 | -0.51934100 | 2.86598300  |
| H               | -2.43327800 | -0.33461200 | -0.26762300 | H               | -0.79440500 | 0.52910600  | 3.34624100  |
| C               | -3.25943500 | -2.11882100 | -0.48448400 | C               | -0.98288500 | -2.92176200 | -0.33730800 |
| H               | -2.99841600 | -3.05119700 | -1.00323100 | H               | -1.27802500 | -2.20552300 | -1.12376300 |
| H               | -3.38228400 | -2.33203600 | 0.59074400  | H               | -0.56572000 | -3.82014600 | -0.81269100 |
| H               | -4.21156300 | -1.73990000 | -0.88836000 | H               | -1.88240900 | -3.21568300 | 0.23236300  |
| O               | -2.74484400 | 1.13329600  | 0.50741900  | C               | -0.26902300 | 3.07955200  | -0.02167000 |
| H               | -2.30649600 | 1.78607100  | -0.08334400 | H               | -0.73378400 | 3.61278600  | 0.81905700  |
| C               | -2.09348300 | 1.20958900  | 1.79221300  | H               | 0.32357400  | 3.79542700  | -0.61173900 |
| H               | -1.02875100 | 0.93268300  | 1.72531700  | H               | -1.05686200 | 2.64050700  | -0.65585500 |
| H               | -2.18517800 | 2.22278000  | 2.21397300  | C               | 0.92899100  | -0.11281800 | -2.06904800 |
| H               | -2.61190300 | 0.50376900  | 2.45514100  | H               | -0.05014000 | 0.35796300  | -2.22756300 |
| O               | -1.23630600 | 2.70820900  | -1.15158700 | H               | 1.31944400  | -0.47502600 | -3.03285000 |
| H               | -1.54469400 | 2.81014500  | -2.06200400 | H               | 0.81221100  | -0.95952000 | -1.37512600 |
| C               | 0.00407900  | 1.95153100  | -1.17919400 | C               | 2.98044700  | -0.79270800 | 1.08285400  |
| H               | -0.16324500 | 0.92884300  | -1.55222900 | H               | 2.55499600  | 0.11763600  | 1.53528700  |
| H               | 0.76269100  | 2.45441400  | -1.79335300 | H               | 2.17101600  | -1.45893500 | 0.76164400  |
| H               | 0.35699100  | 1.90524600  | -0.14340300 | H               | 3.60961300  | -1.31554500 | 1.81878900  |
| <b>MeOH6_27</b> |             |             |             | <b>MeOH6_28</b> |             |             |             |
| C               | 3.89154800  | 1.69285100  | -0.21996300 | O               | 2.30155500  | -0.15209000 | -1.52105400 |
| O               | 3.11416700  | 0.67076700  | -0.85825400 | H               | 1.36711500  | 0.11407100  | -1.45894700 |
| H               | 2.17696500  | 0.97698300  | -0.88151900 | O               | -1.57544400 | -0.93704400 | 0.13746100  |
| H               | 4.93292900  | 1.34453800  | -0.19770200 | H               | -0.94483700 | -0.17555200 | 0.11333500  |
| H               | 3.55584200  | 1.87265400  | 0.81611000  | O               | 0.52222800  | -2.64133000 | 1.00161300  |
| H               | 3.84596200  | 2.63992400  | -0.78233800 | H               | -0.30208800 | -2.13361700 | 0.88042000  |
| H               | 0.24859600  | 1.06130300  | -2.94030900 | O               | 0.07865000  | 1.14657900  | -0.21342300 |
| C               | -0.03612900 | 0.50580100  | -2.03680500 | H               | 0.90430300  | 1.29519800  | 0.30860900  |
| O               | 0.45801300  | 1.24611800  | -0.90789000 | O               | 2.57349100  | 1.21303400  | 0.82596200  |
| H               | -1.13427100 | 0.41425400  | -2.00475300 | H               | 2.74855400  | 0.64105800  | 0.04475600  |



|                 |             |             |             |   |             |             |             |
|-----------------|-------------|-------------|-------------|---|-------------|-------------|-------------|
| H               | 0.41106600  | -0.50207400 | -2.08454300 | O | -3.66413100 | 0.93757500  | -0.01228000 |
| H               | 0.13244400  | 0.78299400  | -0.09677700 | H | -3.05076300 | 0.20370200  | 0.18500800  |
| H               | 1.18006500  | -0.56724500 | 2.22081900  | C | 1.27711300  | -1.98556000 | 2.02885600  |
| C               | 0.19185700  | -0.14497300 | 2.44521300  | H | 0.75996000  | -2.02519600 | 3.00267300  |
| O               | -0.53883900 | -0.10423000 | 1.20168600  | H | 2.23056600  | -2.52400500 | 2.12040900  |
| H               | -0.32562500 | -0.78543500 | 3.17669700  | H | 1.49229800  | -0.93206200 | 1.78048400  |
| H               | 0.30977900  | 0.86587000  | 2.86952500  | C | 2.36045900  | -1.58323300 | -1.72068000 |
| H               | -1.44030900 | 0.26398200  | 1.35805600  | H | 1.92423700  | -1.85657200 | -2.69473700 |
| H               | -2.66509500 | 2.88664900  | 1.27129200  | H | 3.42498800  | -1.84948500 | -1.72678200 |
| C               | -2.86522700 | 2.18283700  | 0.45299100  | H | 1.84660900  | -2.12225200 | -0.90994100 |
| O               | -3.05043900 | 0.88480200  | 1.05359700  | C | -1.63041200 | -1.45081200 | -1.21025300 |
| H               | -3.77539100 | 2.50521000  | -0.07674100 | H | -0.64825800 | -1.84113300 | -1.52272400 |
| H               | -2.00983500 | 2.18774100  | -0.24253500 | H | -2.35493300 | -2.27563300 | -1.21379400 |
| H               | -3.27905100 | 0.26313200  | 0.33200400  | H | -1.96600000 | -0.67281600 | -1.91443600 |
| O               | 2.84174000  | -1.55374600 | 0.78846000  | C | -4.97471200 | 0.53218500  | 0.39262400  |
| C               | 1.89093100  | -2.38759500 | 0.12558700  | H | -5.02364500 | 0.32587300  | 1.47582300  |
| H               | 3.00255700  | -0.78384200 | 0.20115800  | H | -5.65613300 | 1.36276000  | 0.16367100  |
| H               | 1.80074200  | -3.31335600 | 0.71188700  | H | -5.31614700 | -0.36299700 | -0.15634100 |
| H               | 2.21848600  | -2.65415400 | -0.89503100 | C | 3.34967100  | 2.41426200  | 0.67235000  |
| H               | 0.89442300  | -1.91251500 | 0.07162700  | H | 3.08915700  | 3.07549800  | 1.50919200  |
| H               | -2.06784000 | -2.44638100 | -1.84990600 | H | 4.42814000  | 2.19512900  | 0.71381900  |
| C               | -2.38739500 | -2.04440300 | -0.87626600 | H | 3.12083200  | 2.92476400  | -0.27821300 |
| O               | -3.28076900 | -0.91770600 | -1.05663400 | C | -0.63106300 | 2.40057500  | -0.33852500 |
| H               | -1.51791700 | -1.66120500 | -0.32984700 | H | -0.10663800 | 3.07090300  | -1.03758600 |
| H               | -2.86730100 | -2.83855900 | -0.28424600 | H | -1.63457100 | 2.17387400  | -0.71927600 |
| H               | -4.09172200 | -1.23560900 | -1.47519600 | H | -0.72987300 | 2.89020400  | 0.64211100  |
| <b>MeOH6_29</b> |             |             |             |   |             |             |             |
| O               | -2.79529000 | -1.17132800 | 0.53549100  |   |             |             |             |
| H               | -2.03322300 | -1.64077100 | 0.14158300  |   |             |             |             |
| O               | -0.30714300 | -2.02676200 | -0.50330700 |   |             |             |             |
| H               | 0.06098200  | -1.48425700 | 0.22593100  |   |             |             |             |
| O               | 2.92660500  | -0.70862900 | 0.04817400  |   |             |             |             |
| H               | 2.36578000  | -0.91016000 | 0.81909600  |   |             |             |             |
| O               | 1.36815200  | 1.48972100  | -0.29998300 |   |             |             |             |
| H               | 2.01092800  | 0.75304200  | -0.41493500 |   |             |             |             |
| O               | -1.19889100 | 2.19942400  | -1.23734300 |   |             |             |             |
| H               | -0.27670500 | 1.90323700  | -1.14061700 |   |             |             |             |
| O               | 0.61321000  | -0.38890300 | 1.57915700  |   |             |             |             |
| H               | 0.61630600  | 0.47809500  | 1.12382000  |   |             |             |             |
| C               | -3.67649800 | -0.80392300 | -0.53269500 |   |             |             |             |
| H               | -4.55036100 | -0.31780400 | -0.07745300 |   |             |             |             |
| H               | -3.20246600 | -0.09287500 | -1.23180500 |   |             |             |             |
| H               | -4.02344900 | -1.68635500 | -1.09727200 |   |             |             |             |
| C               | -1.76396300 | 2.16819500  | 0.07899300  |   |             |             |             |
| H               | -1.19141000 | 2.79713200  | 0.78516800  |   |             |             |             |
| H               | -2.78080200 | 2.57686300  | 0.00313800  |   |             |             |             |
| H               | -1.83247400 | 1.14111700  | 0.47636900  |   |             |             |             |
| C               | 2.10656600  | 2.69911000  | -0.03703200 |   |             |             |             |
| H               | 2.76777300  | 2.94824000  | -0.88110900 |   |             |             |             |
| H               | 1.36906400  | 3.50296700  | 0.08753800  |   |             |             |             |
| H               | 2.70559500  | 2.60479000  | 0.88275400  |   |             |             |             |
| C               | -0.32775300 | -0.36142500 | 2.67901900  |   |             |             |             |

|   |             |             |             |
|---|-------------|-------------|-------------|
| H | -1.36086300 | -0.31351500 | 2.30538200  |
| H | -0.18495900 | -1.29689200 | 3.23436000  |
| H | -0.11680800 | 0.48829800  | 3.34601000  |
| C | -0.24991700 | -1.22359300 | -1.69807700 |
| H | 0.79177300  | -0.99845200 | -1.98157100 |
| H | -0.71200800 | -1.81371800 | -2.50045100 |
| H | -0.80185600 | -0.27714800 | -1.58423900 |
| C | 3.19502800  | -1.94076400 | -0.65226600 |
| H | 3.67860900  | -1.66708300 | -1.59872500 |
| H | 3.88192700  | -2.57568800 | -0.07144000 |
| H | 2.26472400  | -2.49284300 | -0.85669300 |
